# Supplementary material for: Association analysis of MTHFR (rs1801133 and rs1801131) gene polymorphism towards the development of type 2 diabetes mellitus in Dali area population from Yunnan Province, China
Source: PeerJ. 2024 Oct 24;12:e18334. doi: 10.7717/peerj.18334 (PMC11512809; doi:10.7717/peerj.18334)
Supplement: Data S1 [file peerj-12-18334-s001.xlsx]

## Sheet: Control group
Control group
Number	Name	Gender (male/female)	Age (years)	Call (CT)	Call (AC)	TP (g/L)	ALB (g/L)	GLB (g/L)	ALB/GLB	BUN (mmol/L)	Scr (μmol/L)	SUA (μmol/L)	FBG (mmol/L)	TC (mmol/L)	TG (mmol/L)	HDL-C (mmol/L)	LDL-C (mmol/L)	APOA1 (g/L)	APO-B (g/L)
1	***	female	29	C:C	A:A	75.4	48.4	27	1.8	4.07	60	322	3.93	4.41	0.81	2.03	1.9	1.56	0.61
2	***	female	68	T:T	A:A	73.7	45.6	28.1	1.6	6.2	65	296	3.87	4.22	0.86	1.72	2.15	1.43	0.66
3	***	female	41	C:C	A:A	68.6	40.3	28.3	1.4	3.16	49	176	4.06	4.66	3.12	1.2	2.44	1.42	0.82
4	***	male	43	C:T	A:A	75.5	45.7	29.8	1.5	4.39	59	220	4.23	3.74	0.55	1.82	1.66	1.42	0.55
5	***	female	43	C:C	C:A	77.7	44.9	32.8	1.4	3.31	60	156	4.28	5.53	1.04	1.34	3.57	1.15	0.96
6	***	male	38	C:C	C:A	77.1	48.1	29	1.7	5.42	76	312	3.81	5.99	1.12	1.53	3.8	1.32	1.01
7	***	female	58	C:T	A:A	76.5	44.7	31.8	1.4	5.22	60	347	4.8	5.2	2.03	1.37	3.16	1.31	0.93
8	***	female	74	C:C	C:A	76.2	45.8	30.4	1.5	6.05	59	307	4.78	4.01	1.49	1.13	2.33	1.08	0.73
9	***	male	45	C:T	C:A	73.8	44	29.8	1.5	6.91	87	335	4.33	4.06	1.4	1.11	2.41	1.03	0.73
10	***	female	39	C:C	A:A	82.9	48.6	34.3	1.4	2.94	66	277	4.71	4.77	1.48	1.34	2.71	1.27	0.89
11	***	male	49	C:C	A:A	82.3	46.6	35.7	1.3	7.64	70	319	5.84	3.81	2.6	0.8	2.11	0.94	0.7
12	***	male	48	C:T	A:A	78.9	48.2	30.7	1.6	6.79	92	330	4	5.01	0.78	1.5	2.97	1.35	0.85
13	***	male	57	C:C	C:A	76.3	47	29.3	1.6	5.13	83	266	5.15	3.83	1.21	1.12	2.17	1.06	0.65
14	***	male	77	T:T	A:A	72.4	45.7	26.7	1.7	8.88	79	314	3.67	5.49	1.21	1.27	3.59	1.21	1.04
15	***	female	53	C:C	C:A	72.4	45.1	27.3	1.7	8.31	67	331	4.75	6.89	1.85	1.77	4.25	1.45	1.23
16	***	male	42	C:T	A:A	77	50.6	26.4	1.9	4.69	97	538	4.77	5.55	2.25	1.15	3.5	1.15	1.04
17	***	male	51	C:C	C:A	74.9	46.8	28.1	1.7	4.98	74	511	5.76	6.73	1.73	1.64	4.23	1.45	1.26
18	***	female	45	C:C	A:A	76.2	46.1	30.1	1.5	4.29	60	310	4.24	5.27	2.66	1.55	2.92	1.35	0.89
19	***	male	48	C:C	C:A	80.2	51.8	28.4	1.8	3.98	83	529	4.2	6.5	2.59	1.41	3.95	1.33	1.18
20	***	male	47	C:T	A:A	78.3	48.3	30	1.6	6.22	86	392	5.55	6.46	2.41	1.56	3.99	1.47	1.12
21	***	female	74	C:T	A:A	80.6	48	32.6	1.5	6.33	53	386	4.93	6.92	4.74	0.95	4.28	1.1	1.33
22	***	male	59	T:T	A:A	74.4	48.1	26.3	1.8	8.43	79	473	5.49	4.18	2.81	1	2.19	1.11	0.74
23	***	female	43	C:C	A:A	82.9	48.8	34.1	1.4	4	68	369	4.64	4.42	1.16	1.67	2.29	1.42	0.7
24	***	male	49	C:C	A:A	77.7	47.3	30.4	1.6	4.87	90	413	4.39	3.63	2.86	1	1.59	1.17	0.68
25	***	male	57	C:T	A:A	78.9	49.1	29.8	1.6	8.15	88	431	3.83	4.7	1.21	1.44	2.71	1.3	0.8
26	***	male	43	C:T	A:A	81.3	52.8	28.5	1.9	8.5	83	333	3.93	5.32	1.07	1.9	3	1.42	0.8
27	***	male	51	C:C	C:A	71.7	43.5	28.2	1.5	7.04	78	371	4.59	7.88	1.54	1.52	5.34	1.39	1.42
28	***	male	76	C:C	A:A	81.2	45.1	36.1	1.2	5.73	76	456	4.1	5.99	4.23	0.95	3.57	1.1	1.11
29	***	female	49	C:T	A:A	87.4	46.2	41.2	1.1	6.25	89	398	4.5	5.45	2.12	1.25	3.3	1.18	0.96
30	***	female	45	C:C	A:A	83.2	46.4	36.8	1.3	6.09	59	354	4.35	5.79	1.58	1.54	3.61	1.45	1.03
31	***	male	43	T:T	A:A	81.9	46.1	35.8	1.3	4.78	64	246	4.1	4.1	0.69	2.1	1.76	1.58	0.54
32	***	female	57	C:C	A:A	79.6	38.6	41	0.9	5.91	82	373	4.83	4.36	2	1.05	2.56	1.14	0.84
33	***	male	53	C:C	A:A	79.3	46	33.3	1.4	5.62	104	420	4.63	4.7	0.96	1.59	2.61	1.31	0.74
34	***	male	56	C:T	C:A	71.6	43.9	27.7	1.6	5.86	83	306	5.7	5.62	1.44	1.39	3.46	1.27	0.99
35	***	female	53	C:C	A:A	72.8	45.4	27.4	1.7	8.5	70	333	4.32	4.54	1.34	1.33	2.68	1.29	0.81
36	***	male	55	C:T	A:A	76.1	46.8	29.3	1.6	6.74	112	462	4.41	5.96	1.45	1.34	3.77	1.22	1.07
37	***	female	45	C:C	A:A	77	45.8	31.2	1.5	5.94	80	373	4.01	4.79	1.78	1.48	2.6	1.34	0.83
38	***	male	70	T:T	A:A	75.4	47.2	28.2	1.7	6.16	91	469	4.23	3.96	1.63	0.91	2.41	0.95	0.74
39	***	male	35	C:T	A:A	73.2	47.4	25.8	1.8	5.33	79	309	4.41	4.05	0.86	1.43	2.24	1.06	0.68
40	***	male	66	C:C	C:A	80.1	47.1	33	1.4	4.68	77	528	4.2	7.2	10.14	1.43	3.1	1.47	1.18
41	***	male	59	C:C	C:A	76.8	44.4	32.4	1.4	4.12	93	301	4.43	5.99	1.92	1.58	3.56	1.4	1.05
42	***	male	48	C:T	A:A	79.2	49.2	30	1.6	7.1	57	392	3.93	4.57	1.46	0.79	2.68	1.05	0.92
43	***	female	44	C:T	A:A	79.3	47	32.3	1.5	7.28	50	304	4.1	6.43	1.87	1.69	3.9	1.5	1.13
44	***	male	51	C:C	A:A	75.3	45.6	29.7	1.5	7.5	85	540	4.93	3.71	1.04	1.58	1.79	1.24	0.61
45	***	female	37	C:T	C:A	76	48.2	27.8	1.7	3.24	47	201	5.46	4.81	1.24	1.79	2.46	1.43	0.77
46	***	female	65	C:C	A:A	78.6	49	29.6	1.7	4.22	57	351	4.24	3.97	0.63	1.75	1.96	1.25	0.6
47	***	male	47	C:C	A:A	71.8	46.2	25.6	1.8	3.69	81	429	5.79	4.97	2.33	1.12	2.95	0.96	0.99
48	***	female	66	C:T	A:A	82.2	48.3	33.9	1.4	5	65	338	4.45	4.56	1.11	1.72	2.36	1.36	0.75
49	***	female	40	C:T	A:A	79.2	42.4	36.8	1.2	5.05	64	194	4.61	3.96	0.72	1.86	1.77	1.35	0.6
50	***	male	30	C:C	C:A	78.4	47.8	30.6	1.6	5.02	75	281	4.78	3.68	1.52	1.57	1.56	1.47	0.56
51	***	male	74	C:C	C:A	75.8	50.1	25.7	1.9	5.06	99	417	4.43	5.6	2.31	1.44	3.35	1.21	0.99
52	***	female	43	C:C	C:A	76.3	45.1	31.2	1.4	4.04	65	362	4.13	5.83	0.88	2.36	2.96	1.64	0.87
53	***	male	37	C:T	C:A	80.6	50	30.6	1.6	6.12	91	445	4.65	8.07	1.9	1.94	5	1.54	1.38
54	***	female	75	C:C	C:A	79.1	47.2	31.9	1.5	5.09	70	260	4.12	4.21	0.92	1.44	2.32	1.08	0.68
55	***	male	48	C:T	A:A	71.2	45.3	25.9	1.7	6.31	87	406	4.88	4.61	1.02	1.54	2.53	1.15	0.77
56	***	male	52	C:T	A:A	72.7	45.2	27.5	1.6	4.03	81	350	4.71	5.01	1.87	1.36	2.89	1.21	0.88
57	***	male	56	C:C	A:A	72	45.4	26.6	1.7	5.42	85	437	4.48	5.51	0.98	1.66	3.32	1.26	0.97
58	***	female	29	C:C	A:A	84.8	47.4	37.4	1.3	5.45	58	491	4.02	3.8	0.68	1.73	1.74	1.23	0.61
59	***	female	69	C:T	A:A	78	46.6	31.4	1.5	5.96	63	316	3.99	4.21	0.74	1.96	1.92	1.49	0.65
60	***	male	36	C:T	C:A	70.5	45.3	25.2	1.8	3.47	87	382	4.01	5.52	2.19	1.61	2.98	1.35	0.96
61	***	female	50	C:C	C:A	74.4	42	32.4	1.3	4.49	55	294	3.83	5.72	3.95	1.46	2.98	1.37	0.98
62	***	female	49	C:C	C:A	74	43.4	30.6	1.4	5.1	56	411	4.43	7.08	2.63	2.21	3.9	1.8	1.13
63	***	male	33	C:C	C:A	74.2	44.2	30	1.5	4.23	66	417	4.67	5.55	1.58	1.65	3.11	1.29	0.93
64	***	male	39	C:T	A:A	77.3	46.1	31.2	1.5	5.89	79	352	4.46	4.57	0.92	1.74	2.33	1.24	0.73
65	***	male	62	C:T	A:A	77.9	45.9	32	1.4	5.03	51	309	3.26	3.25	0.47	1.76	1.34	1.28	0.49
66	***	female	47	C:T	A:A	75.5	46.1	29.4	1.6	5.08	71	392	3.41	5.47	2	1.39	3.33	1.18	0.99
67	***	female	35	C:C	A:A	74.6	39.8	34.8	1.1	4	55	337	4.32	4.62	0.87	1.9	2.36	1.48	0.73
68	***	male	35	T:T	A:A	76.9	44.2	32.7	1.4	3.87	84	525	4.78	5.44	8.11	0.94	1.78	1.06	0.85
69	***	female	53	C:C	A:A	81.3	44.9	36.4	1.2	6.23	73	404	4.11	4.49	1.66	1.34	2.59	1.25	0.86
70	***	male	34	C:C	A:A	76	47.4	28.6	1.7	5.13	96	452	4.92	4.8	3.59	1.08	2.7	1	0.95
71	***	female	36	C:T	A:A	76.6	51.8	24.8	2.1	4.9	80	265	4.21	5.6	2.22	1.56	3.19	1.43	1.02
72	***	female	71	C:C	C:A	79.9	47.6	32.3	1.5	5.29	73	184	5.47	4.01	0.71	2.02	1.79	1.41	0.58
73	***	male	31	C:C	A:A	85.8	49.9	35.9	1.4	4.78	49	264	4.16	4.53	1	1.79	2.29	1.3	0.73
74	***	male	50	C:C	C:A	82	47.1	34.9	1.3	3.79	62	311	3.49	4.98	1.83	1.41	2.95	1.19	0.87
75	***	female	53	C:T	A:A	73.4	44	29.4	1.5	4.4	52	266	4.66	5.76	1.2	1.95	3.2	1.4	0.93
76	***	male	32	C:T	C:A	82	50.1	31.9	1.6	6.47	72	611	3.81	4.95	7.29	0.94	1.63	1.23	0.77
77	***	male	58	C:C	A:A	73.9	44.8	29.1	1.5	6.25	90	366	4.45	4.7	2.27	1.15	2.66	1.12	0.86
78	***	female	76	C:C	A:A	79.3	46.4	32.9	1.4	3.07	60	269	4.14	4.07	1.1	1.75	1.93	1.34	0.64
79	***	male	28	C:C	A:A	76.1	48.1	28	1.7	5.47	97	429	4.43	4.71	1.66	1.42	2.65	1.11	0.77
80	***	female	35	C:T	C:A	78	44.3	33.7	1.3	3.77	45	203	4.09	4.86	0.79	1.57	2.83	1.21	0.8
81	***	male	54	T:T	A:A	76.3	46.6	29.7	1.6	4.85	88	528	6.08	6.57	2.57	1.23	4.24	1.2	1.31
82	***	male	44	C:T	C:A	75.9	48	27.9	1.7	4.42	80	543	5.08	5.86	2.55	1.13	3.55	1.06	1.13
83	***	female	54	C:C	A:A	80.5	49.7	30.8	1.6	6.34	56	299	4.29	7.05	2.03	1.65	4.29	1.34	1.16
84	***	female	43	C:T	A:A	76.9	45.9	31	1.5	5.87	59	236	4.45	5.16	0.88	1.77	2.9	1.24	0.85
85	***	male	58	C:C	A:A	78.3	46.4	31.9	1.5	6.93	88	402	4.74	5.71	2	1.37	3.47	1.22	1.01
86	***	male	34	C:C	A:A	75.2	48.5	26.7	1.8	4.14	93	406	3.9	5.36	2.85	1.21	3.05	1.15	0.96
87	***	male	75	C:C	C:A	77.4	45.7	31.7	1.4	5.31	102	436	4.44	5.2	0.92	1.67	2.95	1.36	0.88
88	***	female	32	C:T	A:A	73.7	44.3	29.4	1.5	4.31	51	237	4.08	4.04	1.18	1.83	1.82	1.36	0.6
89	***	female	34	C:T	A:A	80.4	48.6	31.8	1.5	5.25	58	304	3.98	3.65	2.22	1.55	1.48	1.45	0.57
90	***	male	46	C:C	A:A	75.6	47.5	28.1	1.7	4.79	88	406	4.49	5.9	2.32	1.34	3.55	1.14	1.03
91	***	female	49	C:T	A:A	82.8	45.8	37	1.2	4.4	53	472	4.51	5.82	2.65	1.35	3.52	1.22	1.04
92	***	male	46	C:T	C:A	77.8	46.5	31.3	1.5	7.03	104	549	5.45	4.31	1.55	1.46	2.33	1.21	0.77
93	***	female	69	C:T	A:A	78.1	44	34.1	1.3	5.53	58	525	4.38	4.2	2.31	1.15	2.33	1.13	0.76
94	***	female	65	C:T	C:A	73.4	45.9	27.5	1.7	3.9	57	243	3.85	5.3	1.21	2.24	2.56	1.59	0.74
95	***	female	38	C:C	A:A	75.1	47.6	27.5	1.7	5.7	53	218	5.28	5.21	0.9	2.15	2.68	1.61	0.78
96	***	male	38	C:T	C:A	75.8	46.7	29.1	1.6	2.99	51	182	4.89	4.07	0.71	1.69	2.15	1.26	0.64
97	***	male	40	T:T	A:A	73.5	44.3	29.2	1.5	4.19	56	227	4.54	4.88	0.99	1.94	2.57	1.35	0.76
98	***	female	71	C:C	A:A	83.5	46.9	36.6	1.3	6.96	52	280	4.2	4.62	0.51	2.06	2.33	1.53	0.72
99	***	female	44	T:T	A:A	75.5	44	31.5	1.4	3.75	44	263	3.98	4.66	1.33	1.99	2.26	1.5	0.71
100	***	female	62	C:T	A:A	80.9	44.9	36	1.2	4.93	49	266	5.03	4.94	4.99	1.19	2.13	1.26	0.74
101	***	male	33	T:T	A:A	80.3	48.8	31.5	1.5	6.02	70	388	4	5.59	1.54	1.61	3.43	1.41	0.98
102	***	male	51	C:T	A:A	74.5	44.1	30.4	1.5	4.81	91	453	4.26	4.86	2.86	0.91	2.94	0.9	0.97
103	***	male	51	C:C	A:A	77.6	49	28.6	1.7	4.93	81	503	5.15	5.38	1.34	1.67	3.11	1.29	0.94
104	***	female	64	C:T	C:A	72.8	43.5	29.3	1.5	10.5	169	607	4.91	4.53	2.33	1.52	2.35	1.43	0.79
105	***	male	70	T:T	A:A	80.4	47.7	32.7	1.5	4.3	75	449	4.76	5.05	1.65	1.46	3	1.24	0.9
106	***	female	55	C:C	A:A	77.2	44.7	32.5	1.4	6.68	57	261	5.17	6.45	1.93	1.96	3.67	1.68	1.07
107	***	female	51	T:T	A:A	78.3	46.7	31.6	1.5	4.96	66	244	5.25	5.85	1.79	1.53	3.54	1.3	1.01
108	***	female	45	C:T	A:A	69.2	42.9	26.3	1.6	3.73	62	210	4.05	4.13	0.9	1.73	2.04	1.29	0.6
109	***	male	58	C:T	C:A	81.8	43.1	38.7	1.1	6.23	67	258	4.87	4.63	1.83	1.21	2.75	1.08	0.88
110	***	male	65	C:C	C:A	83.1	46.7	36.4	1.3	5.63	60	353	5.09	4.07	2.54	1.14	2.2	1.18	0.8
111	***	female	57	C:T	A:A	85.6	46.8	38.8	1.2	5.71	60	400	4.74	6.3	2.13	1.83	3.8	1.5	1.06
112	***	female	71	C:C	A:A	81.1	50.2	30.9	1.6	5.95	44	238	4.41	5.68	0.85	1.89	3.4	1.39	0.92
113	***	female	50	C:C	C:A	75.7	42	33.7	1.2	5.85	56	285	4.69	4.6	1.21	1.29	2.74	1.06	0.81
114	***	female	56	C:T	A:A	83.3	47.3	36	1.3	5.47	64	353	5.79	6.79	1.04	1.91	4.43	1.45	1.21
115	***	female	66	C:T	A:A	80.5	48.5	32	1.5	5.03	49	293	4.74	5.73	1.78	1.69	3.3	1.46	0.98
116	***	male	47	C:C	A:A	75	45.7	29.3	1.6	5.09	86	260	4.54	5.31	1.14	1.44	3.27	1.22	0.96
117	***	female	55	C:T	A:A	78.3	44.6	33.7	1.3	3.92	53	379	5.19	7.35	1.86	1.87	4.61	1.41	1.26
118	***	female	58	C:C	C:A	82.8	47.6	35.2	1.4	2.89	57	227	4.86	6.04	1.51	2.01	3.46	1.67	1.05
119	***	male	79	C:C	A:A	72.4	42.1	30.3	1.4	8.36	99	498	4.14	5.42	0.88	1.62	3.32	1.27	0.92
120	***	female	71	C:C	C:A	77.4	49.1	28.3	1.7	6.84	73	378	5.41	5.56	1.89	1.96	3	1.61	0.93
121	***	male	74	T:T	A:A	78.4	49.4	29	1.7	6.82	80	373	4.42	5.61	2.65	1.07	3.37	1.09	1.01
122	***	male	85	C:T	A:A	74.7	42.6	32.1	1.3	6.19	93	361	4.7	3.89	0.67	2.15	1.49	1.5	0.56
123	***	female	66	C:T	A:A	76.5	43.8	32.7	1.3	4.81	56	367	4.76	4.22	1.6	1.6	2.14	1.41	0.73
124	***	female	82	C:C	A:A	81.7	45.1	36.6	1.2	3.73	66	363	5.45	5.55	1.32	1.32	3.41	1.09	0.99
125	***	male	73	C:T	C:A	71.9	46.7	25.2	1.9	7.79	54	378	6.03	5.63	1.41	1.52	3.45	1.31	1.04
126	***	female	83	C:T	A:A	81.2	44.2	37	1.2	3.8	76	314	6.06	5.12	2.97	1.47	2.7	1.31	0.88
127	***	male	79	C:T	A:A	85.6	51.3	34.3	1.5	6.04	93	405	6	4.35	0.72	2.15	1.88	1.5	0.61
128	***	female	75	C:T	A:A	74.3	41.1	33.2	1.2	4.01	75	305	5.34	5.45	1.7	1.31	3.48	1.24	1
129	***	male	82	T:T	A:A	75.4	44.4	31	1.4	3.84	80	262	5.36	5.18	0.99	2.06	2.71	1.43	0.75
130	***	male	88	C:T	A:A	75.7	43.2	32.5	1.3	6.85	105	447	4.24	5.39	2	1.28	3.25	1.12	0.94
131	***	male	88	C:T	C:A	76.7	41.2	35.5	1.2	9.47	129	405	5.08	4.04	0.94	1.53	2.21	1.18	0.7
132	***	female	67	C:C	A:A	75.9	44.8	31.1	1.4	4.43	61	290	4.23	4.66	0.83	1.73	2.55	1.26	0.73
133	***	male	76	T:T	A:A	71.5	42.5	29	1.5	6.14	105	453	4.01	3.64	0.76	2.01	1.42	1.37	0.52
134	***	male	70	C:C	A:A	79.3	47.4	31.9	1.5	7.09	130	486	4.92	7.33	2.86	1.13	4.9	1.13	1.46
135	***	male	39	C:T	C:A	80.3	51.5	28.8	1.8	5.06	83	530	4.86	5.59	4.11	1.09	3.1	1.12	1.03
136	***	female	57	C:T	A:A	83.9	48.3	35.6	1.4	7.27	75	215	6.1	7.02	1.76	1.59	4.52	1.39	1.27
137	***	female	74	C:C	C:A	75.4	45.8	29.6	1.5	4.53	56	340	5.79	6.3	2.07	1.5	3.86	1.34	1.12
138	***	male	82	C:C	C:A	78.9	46.1	32.8	1.4	6.52	94	448	4.94	4.64	3.49	1.33	2.39	1.26	0.8
139	***	female	81	C:C	C:A	72.7	38.9	33.8	1.2	4.23	79	334	4.47	7.25	1.41	1.68	4.75	1.43	1.32
140	***	female	59	C:T	A:A	78.3	47	31.3	1.5	7.75	67	198	4.26	4.67	0.73	2.06	2.37	1.54	0.71
141	***	female	77	C:T	A:A	89	49	40	1.2	6.54	87	444	5.99	5.05	1.73	1.94	2.63	1.69	0.82
142	***	male	83	C:T	A:A	72.1	44.6	27.5	1.6	8.71	146	289	5.94	3.74	1.79	1.4	1.73	1.21	0.62
143	***	male	85	T:T	A:A	81.9	49.5	32.4	1.5	4.63	82	492	6	5.73	2.43	1.73	3.24	1.5	0.98
144	***	female	45	C:T	C:A	67.9	45.5	22.4	2	6.75	62	319	4.2	5	1.36	1.5	2.89	1.36	0.85
145	***	male	45	C:T	A:A	70.4	46.2	24.2	1.9	3.7	99	377	4.37	4.2	2.98	0.88	2.33	0.97	0.78
146	***	female	67	C:C	A:A	68.9	46.4	22.5	2.1	4.98	61	303	3.6	4.13	1.97	1.35	2.12	1.36	0.72
147	***	male	61	C:T	C:A	74.1	49	25.1	2	4.87	96	295	3.52	6.07	3.08	1.12	3.72	1.32	1.1
148	***	male	46	C:T	A:A	72.3	43.5	28.8	1.5	7.96	83	384	4.03	5.25	1.09	1.2	3.24	1.13	0.95
149	***	male	45	C:C	A:A	78.1	48.4	29.7	1.6	5.56	74	338	6.1	6.27	1.84	1.17	4.1	1.17	1.16
150	***	male	57	C:T	A:A	70.8	47.3	23.5	2	4.8	79	376	4.68	4.76	2.23	1.41	2.39	1.36	0.81
151	***	male	80	C:C	C:A	68.5	42.4	26.1	1.6	4.73	113	344	4.56	4.84	1.65	1.12	2.83	1.15	0.92
152	***	male	82	C:C	C:A	74.1	41.9	32.2	1.3	7.86	76	313	5.1	4.25	0.87	1.7	2.06	1.41	0.7
153	***	female	53	C:C	A:A	69.9	44	25.9	1.7	3.82	60	262	3.94	7.22	1.26	1.22	5.1	1.12	1.33
154	***	male	72	C:T	C:A	71.8	47.7	24.1	1	4.58	99	446	4.4	4.97	3.28	1.04	2.72	1.22	0.92
155	***	female	37	C:C	A:A	69.7	42	27.7	1.5	4.71	53	185	4.01	5.08	1.45	1.4	2.92	1.21	0.84
156	***	male	39	C:T	A:A	68.9	48.2	20.7	2.3	4.99	85	385	4.78	4.75	1.68	1.07	2.93	1.13	0.88
157	***	female	60	T:T	A:A	72.8	43.6	29.2	1.5	4.35	52	289	4.16	4.76	0.97	1.66	2.59	1.43	0.8
158	***	female	42	C:C	C:A	69.7	46.6	23.1	2	3.15	65	344	4.06	4.69	2.17	0.97	2.86	1.04	0.86
159	***	male	43	C:T	A:A	71.6	46.6	25	1.9	6.73	82	398	4.24	3.76	3.6	0.71	1.66	0.96	0.73
160	***	female	61	C:T	A:A	70	43.6	26.4	1.7	5.09	65	334	5.23	5.57	1.79	1.46	3.41	1.34	1
161	***	male	56	C:T	A:A	73.5	48.1	25.4	1.9	5.56	67	386	4.53	5.28	1.73	1.47	2.78	1.37	1
162	***	male	55	C:T	C:A	71	48.3	22.7	2.1	4.75	104	430	4.38	2.95	1.57	1.63	0.64	1.31	0.41
163	***	male	57	C:T	C:A	69.3	44.8	24.5	1.8	4.48	69	350	5.98	5.32	1.27	1.69	2.58	1.49	0.96
164	***	male	45	C:T	A:A	77	47	30	1.6	5.17	89	628	5.93	6.41	2.76	1.42	3.48	1.39	1.14
165	***	male	43	C:T	C:A	68.7	44.2	24.5	1.8	4.28	70	399	5.34	6.12	1.45	1.52	3.4	1.28	1.08
166	***	female	78	C:T	C:A	81.9	49.5	32.4	1.5	4.45	50	245	4.85	6.26	1.02	1.51	3.69	1.31	1.14
167	***	female	43	C:T	A:A	73	43.2	29.8	1.4	5.07	64	207	4.4	6.16	1.05	1.79	3.35	1.44	1.03
168	***	male	58	C:T	C:A	70.7	46.2	24.5	1.9	3.83	64	380	4.78	5.75	1.44	2.19	2.52	1.79	0.84
169	***	male	58	C:T	C:A	74.4	46.2	28.2	1.6	5.91	76	418	5.74	5.44	2.38	0.97	3.35	0.95	1
170	***	male	53	C:T	C:C	70	42.4	27.6	1.5	5.36	82	427	5.35	5.8	1.87	1.36	3.37	1.09	1.06
171	***	female	33	C:C	A:A	67	43.6	23.4	1.9	6.21	52	306	5.16	4.95	0.78	2.3	2.02	1.47	0.69
172	***	male	66	C:T	A:A	75.2	45.6	29.6	1.5	4.3	79	384	6.03	4.84	1.66	1.98	2.03	1.57	0.7
173	***	male	78	C:T	C:A	78	46.4	31.6	1.5	4.92	95	648	5.67	4.76	2.15	1.31	2.58	1.13	0.81
174	***	female	38	C:T	A:A	77.3	46.7	30.6	1.5	3.65	71	284	5.12	7.62	1.08	1.54	4.95	1.2	1.3
175	***	male	64	T:T	A:A	67	42.4	24.6	1.7	5.63	77	525	5.02	4.44	0.73	1.91	2.07	1.16	0.81
176	***	female	61	C:C	A:A	71.3	46	25.3	1.8	5.55	64	316	5.22	5.84	1.13	1.53	3.58	1.18	1.12
177	***	male	77	T:T	A:A	70	44.6	25.4	1.8	6.27	56	372	4.51	4.6	2.13	1.23	2.6	1.05	0.89
178	***	female	45	C:C	A:A	72.6	45.2	27.4	1.6	4.71	65	268	4.84	7.81	1.25	1.81	4.72	1.31	1.31
179	***	female	55	C:C	A:A	69.1	40.2	28.9	1.4	4.64	49	280	5.98	7.52	2.33	1.55	4.64	1.24	1.36
180	***	male	55	C:T	C:A	68.3	41.5	26.8	1.5	6.19	98	398	4.9	5.48	2.28	2	2.61	1.64	0.92
181	***	female	48	T:T	A:A	74.2	45	29.2	1.5	2.86	48	143	4.91	4.11	0.68	2.31	1.58	1.39	0.61
182	***	female	73	C:T	A:A	72	44.3	27.7	1.6	3.18	71	295	4.82	6.2	1.33	2.01	3.46	1.42	1.1
183	***	female	55	C:C	A:A	68.2	42.1	26.1	1.6	5.97	67	301	5.05	7.12	1.42	1.79	4.36	1.37	1.29
184	***	female	47	C:C	C:A	72.4	43.6	28.8	1.5	3.93	63	438	5.61	5.49	0.99	1.94	2.91	1.45	0.97
185	***	female	52	C:T	A:A	72.9	42.5	30.4	1.4	3.71	58	298	4.64	5.26	1.85	1.43	2.83	1.2	0.94
186	***	male	52	C:T	A:A	70	44.8	25.2	1.8	4.43	84	208	5.11	5.44	2.22	1.4	2.92	1.27	1.03
187	***	male	78	C:T	C:A	73.1	43.2	29.9	1.4	3.22	67	542	5.98	4.06	1.66	0.99	2.33	0.87	0.79
188	***	female	55	C:C	C:A	73.5	45.6	27.9	1.6	5.22	57	289	5.57	6.88	0.88	2	3.94	1.43	1.14
189	***	male	54	C:T	A:A	66.9	42.4	24.5	1.7	4.65	95	251	5.12	5.45	1.61	1.64	2.9	1.21	0.98
190	***	female	42	C:T	A:A	76.9	46.7	30.2	1.5	4.94	56	224	5.75	5.82	0.82	1.64	3.45	1.24	1.09
191	***	male	58	C:T	A:A	69.9	42.1	27.8	1.5	5.11	84	397	4.98	4.63	2.14	1.36	2.43	1.16	0.82
192	***	male	45	C:T	A:A	68.7	42.6	26.1	1.6	5.09	70	394	4.79	5.67	1.55	1.11	3.39	1.15	1.07
193	***	female	79	C:T	A:A	71.9	43.1	28.8	1.5	3.42	63	312	5.2	5.24	0.92	1.51	2.88	1.24	0.93
194	***	male	56	C:T	A:A	76.3	45	31.3	1.4	5.04	94	450	4.85	5.46	1.54	0.97	3.32	1.06	1.08
195	***	male	53	C:T	C:A	70.5	43.3	27.2	1.6	4.65	75	329	6.01	4.64	1.91	1.05	2.59	1.11	0.86
196	***	female	57	C:C	A:A	76.6	44	32.6	1.3	3.58	57	314	5.97	5.68	1.06	1.83	2.82	1.37	0.99
197	***	female	44	C:C	C:A	68.6	41.2	27.4	1.5	3.77	56	220	4.96	5.14	0.6	2.35	2.02	1.66	0.7
198	***	male	47	C:C	A:A	76	41.7	34.3	1.2	7.22	57	287	6.3	5.14	2.3	1.12	2.81	1.2	0.94
199	***	female	49	C:C	C:A	67.7	38.2	29.5	1.3	4.56	63	238	5.11	5.77	0.83	1.6	3.14	1.39	1.04
200	***	male	59	C:C	A:A	72.2	42.5	29.7	1.4	6.12	96	495	5.16	4.13	2.37	0.94	2.05	1.11	0.77
201	***	male	58	T:T	A:A	77.8	46.4	31.4	1.5	4.69	94	452	4.9	4.88	5.31	0.71	2.14	1.08	0.9
202	***	female	45	C:C	C:A	77.8	43.5	34.3	1.3	5.82	57	403	4.33	4.84	0.83	1.31	2.73	1.16	0.88
203	***	female	70	C:T	C:A	72.8	40.3	32.5	1.2	7.32	75	337	4.34	4.46	0.91	1.25	2.43	1.11	0.81
204	***	male	43	C:T	C:A	72	47.4	24.6	1.9	6.64	74	381	5.43	4.92	1.73	1.35	2.72	1.25	0.92
205	***	male	47	C:T	A:A	72.9	46.2	26.7	1.7	3.14	81	321	4.5	6.12	1.38	1.59	3.33	1.33	0.99
206	***	male	44	C:T	A:A	72.6	43.5	29.1	1.5	4.86	75	476	5.28	5.15	1.48	1.07	3.09	1.13	1.02
207	***	female	47	C:C	C:A	69.1	43.5	25.6	1.7	3.96	48	299	4.47	4.5	1.91	1.1	2.42	1.22	0.88
208	***	male	71	C:T	A:A	71.3	44.1	27.2	1.6	4.04	74	381	4.69	4.07	2.06	0.86	2.22	0.94	0.81
209	***	male	47	C:C	A:A	70.7	41.6	29.1	1.4	5.53	119	324	5.03	3.6	1.51	1.09	1.65	1.05	0.68
210	***	female	49	C:T	A:A	74.7	44.2	30.5	1.4	3.48	60	270	5.04	5.04	1.25	1.36	2.86	1.26	0.95
211	***	male	55	C:C	C:A	69.7	42.9	26.8	1.6	6.33	97	410	4.81	4.28	2.26	1	2.17	1.21	0.76
212	***	male	50	C:T	C:A	68.1	44.6	23.5	1.9	4.27	82	488	4.8	4.63	2.54	0.84	2.61	1.02	0.91
213	***	female	71	C:T	A:A	71.8	42.7	29.1	1.5	5.43	71	219	4.65	5.56	0.93	1.7	3.05	1.42	0.92
214	***	female	43	C:T	A:A	69.8	43.9	25.9	1.7	4.73	49	252	5.55	4.73	1.12	1.69	2.14	1.43	0.73
215	***	male	47	C:T	A:A	68.4	40.7	27.7	1.5	6	57	240	4.7	4.02	0.59	1.51	1.73	1.34	0.64
216	***	female	58	T:T	A:A	70.4	42.7	27.7	1.5	4.48	66	312	5.48	4.73	1.98	1.11	2.47	1.16	0.87
217	***	female	42	C:C	C:A	72.7	42.5	30.2	1.4	6.34	59	262	4.78	5.05	0.86	1.55	2.72	1.38	0.9
218	***	male	52	C:T	C:A	71.8	44.7	27.1	1.6	5.24	100	253	5.22	5.57	1.01	1.27	3.37	1.12	0.98
219	***	female	51	C:T	A:A	71.2	43.2	28	1.5	5.2	59	327	5.58	5.08	2.93	1.05	2.82	1.08	0.96
220	***	female	45	C:T	A:A	76.6	42.2	34.4	1.2	5.96	53	151	4.54	4.62	0.91	1.57	2.37	1.39	0.78
221	***	male	49	C:C	C:A	76.1	45.2	30.9	1.5	4.57	63	267	4.86	4.48	0.94	1.43	2.34	1.18	0.75
222	***	male	42	C:T	A:A	65.5	40.7	24.8	1.6	3.65	59	154	4.45	4.91	0.7	2.24	2.07	1.5	0.68
223	***	female	73	C:C	A:A	75	44.5	30.5	1.5	5.37	67	244	4.83	4.73	1.41	1.89	2.09	1.44	0.7
224	***	female	48	C:C	C:A	81.7	44.7	37	1.2	5.1	58	218	5.55	5.52	1.07	1.54	3.09	1.26	0.92
225	***	female	44	C:T	A:A	76.5	44.5	32	1.4	4.03	62	309	5.16	5.25	1.44	1.42	2.94	1.19	0.91
226	***	male	44	C:T	A:A	78.8	47.6	31.2	1.5	5.81	96	473	5.73	5.17	1.72	1.34	2.82	1.24	0.91
227	***	female	46	C:C	C:A	72.5	39	33.5	1.2	5.46	56	312	4.71	4.43	0.74	1.59	2.18	1.35	0.72
228	***	female	47	T:T	A:A	82.8	45.1	37.7	1.2	3.06	57	253	4.85	4.9	1.32	1.14	2.8	1.07	0.94
229	***	female	51	C:T	A:A	71.8	44.8	27	1.7	5.89	79	278	4.98	5.28	0.91	1.9	2.6	1.37	0.82
230	***	male	77	C:T	A:A	75.9	48	27.9	1.7	5.63	85	243	4.57	5.56	2.12	1.55	2.75	1.38	0.91
231	***	male	54	C:T	C:A	71	48.4	22.6	2.1	6.74	82	352	5.56	4.59	0.81	1.44	2.42	1.22	0.78
232	***	female	48	C:T	C:A	72.2	42.6	29.6	1.4	4.58	69	264	4.32	5.03	1.06	0.78	3.3	0.73	0.99
233	***	male	41	C:C	A:A	69.6	46	23	1.9	6.12	74	351	4.39	5.27	0.92	1.11	3.15	1.29	0.93
234	***	male	49	C:T	C:A	75	46.6	28.4	1.6	5.93	101	444	4.26	7.45	2.37	1.61	4.76	1.45	1.33
235	***	male	50	T:T	A:A	77.8	49.8	28	1.8	5.46	83	512	5.13	3.86	1.73	0.84	2.34	0.96	0.77
236	***	male	51	C:C	C:A	79.3	48.3	31	1.6	6.78	74	374	4.27	6.19	9.25	0.69	2.21	1.05	0.89
237	***	female	75	C:T	A:A	78.6	50	28.6	1.7	3.42	48	233	3.87	3.98	1.21	1.37	2.11	1.24	0.63
238	***	female	44	C:C	A:A	82.6	47.4	35.2	1.3	4.63	58	343	4.51	6.09	1.35	1.86	3.51	1.49	1.08
239	***	male	50	T:T	A:A	77	48.4	28.6	1.7	5.98	77	410	5.44	6.14	1.66	1.31	4	1.11	1.15
240	***	female	44	C:C	A:A	77	44.1	32.9	1.3	5.31	59	358	4.61	3.73	0.71	1.98	1.5	1.45	0.52
241	***	female	50	C:C	A:A	82.3	41.3	41	1	4.91	64	359	4.67	4.29	1.33	1.37	2.51	1.17	0.81
242	***	male	43	C:C	A:A	79	48.1	30.9	1.6	5.99	90	500	4.7	5.94	1.77	1.45	3.74	1.17	1.09
243	***	female	66	C:T	C:A	74.1	42.3	31.8	1.3	3.68	54	251	4.77	4.9	1.32	1.37	2.56	1.19	0.94
244	***	male	55	C:T	C:A	81.8	49.4	32.4	1.5	7.07	111	520	5.71	5.68	3.3	1.17	2.95	1.26	1.12
245	***	female	44	C:T	A:A	69.1	42.4	26.7	1.6	3.48	59	225	4.83	6.12	1.84	1.19	3.62	1.12	1.13
246	***	female	47	C:T	A:A	69.6	45.1	24.5	1.8	6.41	52	325	4.86	6.35	1.23	1.85	3.71	1.43	1.18
247	***	male	40	C:C	A:A	73.2	48.8	24.4	2	5.01	81	403	5.06	5.19	1.51	1.33	2.62	1.33	0.68
248	***	female	79	C:T	C:A	75	45	30	1.5	4.27	38	213	5.29	5.44	0.89	1.8	3.12	1.64	0.87
249	***	female	39	C:T	A:A	76.8	47.9	28.9	1.7	4.9	57	306	4.93	5.23	0.83	1.92	2.75	1.62	0.72
250	***	male	55	C:C	C:A	70.5	49.5	21	2.4	4.9	90	426	5.85	4.69	7.53	0.86	1.48	1.19	0.7
251	***	male	51	C:C	A:A	75	49.1	25.9	1.9	5.2	85	432	5.43	3.93	2.76	1.27	1.75	1.41	0.59
252	***	female	50	C:T	A:A	76	44.3	31.7	1.4	5.12	60	319	5.68	4.62	2.03	1.2	2.16	1.21	0.66
253	***	female	36	C:C	C:C	80.3	46.2	34.1	1.4	5.23	43	249	4.97	4.7	1.22	1.43	2.28	1.11	0.62
254	***	female	77	C:T	A:A	79.2	45.4	33.8	1.3	3.36	64	306	4.84	3.79	1.23	1.08	1.8	1.08	0.57
255	***	female	43	C:T	A:A	68	42	26	1.6	5.11	58	292	4.82	5.14	1.06	1.5	2.93	1.39	0.71
256	***	male	56	C:T	C:A	73	46.8	26.2	1.8	4.09	90	376	4.82	5.14	1.16	1.71	2.82	1.6	0.72
257	***	female	46	C:T	A:A	77	46.2	30.8	1.5	5.34	49	301	4.7	4.89	0.83	2.7	1.41	2.01	0.54
258	***	male	50	C:C	A:A	80	48.6	31.4	1.5	6.33	82	374	5.31	5.04	1.15	1.35	2.63	1.23	0.7
259	***	male	57	T:T	A:A	79.2	47.1	32.1	1.5	3.46	90	434	5.78	4.15	0.98	0.98	2.17	0.92	0.65
260	***	male	54	C:C	A:A	70	45.4	24.6	1.8	7.18	61	392	5.24	4.53	2.17	0.94	2.2	1.02	0.66
261	***	male	61	C:T	A:A	81.5	49.9	31.6	1.6	5.17	66	461	4.87	4.83	2.37	0.82	2.43	1.01	0.77
262	***	male	61	C:T	C:C	77.4	50.5	26.9	1.9	7.06	113	306	5.56	4	1.78	1.33	2.04	1.3	0.59
263	***	female	54	C:T	A:A	75	43.5	31.5	1.4	3.37	61	302	4.71	4.73	0.71	2.29	1.9	1.97	0.59
264	***	female	48	C:T	C:A	72.1	42.4	29.7	1.4	7.4	57	255	5.18	5.1	2.21	1.5	2.75	1.46	0.79
265	***	male	57	C:T	C:A	70	43.5	26.5	1.6	3.92	63	291	4.41	4.74	1.02	2.05	3.04	0.98	0.78
266	***	male	48	C:C	C:A	72.4	48.7	23.7	2.1	5.68	61	312	4.56	4.53	0.56	2.15	2.14	1.62	0.55
267	***	female	40	C:C	C:C	65.8	45	20.8	2.2	6.01	51	309	4.9	5.11	2.36	1.34	2.79	1.33	0.72
268	***	female	54	C:T	C:A	72.8	43.9	28.9	1.5	5.44	72	325	4.96	5.59	1.39	1.82	3.12	1.59	0.78
269	***	male	53	C:C	A:A	70	46.4	23.5	2	4.85	80	345	5.27	4.72	1.54	1.08	2.95	1.1	0.73
270	***	female	38	C:T	C:A	74.9	48.8	26.1	1.9	4.54	50	252	5.12	5.01	1.23	1.52	2.95	1.37	0.71
271	***	female	54	C:C	A:A	68.1	44.1	24	1.8	8	54	310	5.03	4.9	0.74	1.84	2.65	1.63	0.64
272	***	female	55	T:T	A:A	73.4	46.3	27.1	1.7	5	85	349	4.92	4.12	1.45	1.66	1.89	1.59	0.51

## Sheet: T2DM group
T2DM group
Number	Name	Gender (male/female)	Age (years)	Call (CT)	Call (AC)	TP (g/L)	ALB (g/L)	GLB (g/L)	ALB/GLB	BUN (mmol/L)	Scr (μmol/L)	SUA (μmol/L)	FBG (mmol/L)	TC (mmol/L)	TG (mmol/L)	HDL-C (mmol/L)	LDL-C (mmol/L)	APOA1 (g/L)	APO-B (g/L)
1	***	male	65	C:T	A:A	84.9	53.6	31.3	1.7	7.55	82	364	7.7	4.21	1.95	1.02	2.37	1.22	0.8
2	***	female	27	C:T	A:A	60.9	38.4	22.5	1.7	4.29	49	375	5.83	4.5	1.66	0.88	2.67	0.97	0.83
3	***	male	65	C:T	A:A	62.9	42.8	20.1	2.1	6.44	92	491	6.8	4.59	1.77	0.86	2.79	1.05	0.88
4	***	female	66	C:C	C:C	73.9	44.3	29.6	1.5	5.91	41	184	17.33	5.36	1.39	2.23	2.28	1.79	0.7
5	***	male	71	C:C	C:A	61.7	37	24.7	1.5	5.66	62	313	15.25	5.18	1.53	0.99	3.17	1.11	1.02
6	***	male	40	T:T	C:C	77.7	47.2	30.5	1.5	8.42	61	263	20.48	5.24	2.49	0.99	0.11	1.18	1.06
7	***	male	40	C:T	C:A	65.4	42.3	23.1	1.8	3.49	72	345	9.06	5.39	1.82	1.08	3.47	1.16	1.05
8	***	male	56	C:C	A:A	74	47.8	26.2	1.8	4.43	78	354	9.74	5.96	2.65	0.86	4.06	0.95	1.23
9	***	male	88	T:T	A:A	73	44	29	1.5	4.68	62	246	7.16	4.92	1.41	1.2	2.88	1.05	0.88
10	***	male	48	C:C	A:A	57.9	34.9	23	1.5	18.91	543	306	12.45	4.45	1.99	0.56	0.94	0.73	0.44
11	***	male	60	C:T	C:C	91.5	50.6	40.9	1.2	6.77	81	422	13.27	5.44	2.31	0.84	3.7	0.93	1.12
12	***	male	49	T:T	A:A	76.5	48.2	28.3	1.7	6.53	67	302	15.75	4	1.29	0.78	2.57	0.84	0.76
13	***	female	31	C:T	A:A	79.5	52.7	26.8	2	4.04	46	536	9.46	4.49	1.9	1.25	2.44	1.31	0.74
14	***	female	63	C:C	A:A	64.9	37.6	27.3	1.4	10.52	247	281	8.08	4.07	1.38	1.11	2.57	1.14	0.74
15	***	female	60	C:C	A:A	62.9	43.9	19	2.3	4.75	41	225	8.18	6.78	2.55	1	4.58	1.17	1.29
16	***	female	59	C:T	A:A	61.9	23.7	38.2	0.6	4.19	69	427	3.72	5.92	1.39	0.51	2.47	0.6	0.99
17	***	male	55	C:T	C:A	64.7	31.4	33.3	0.9	9.6	94	307	14.09	5.13	1.88	0.76	3.34	0.76	1.2
18	***	male	49	T:T	C:A	71.3	45.2	26.1	1.7	7.25	71	277	8.78	4.25	1.29	1.14	2.45	1.16	0.72
19	***	female	66	C:C	C:C	73.9	44.3	29.6	1.5	5.91	41	184	17.33	5.36	1.39	2.23	2.28	1.79	0.7
20	***	male	53	C:T	C:A	65.7	40.8	24.9	1.6				5.87	3.27	1.13	1.13	1.76	1.15	0.65
21	***	male	38	T:T	A:A	78.2	50.6	27.6	1.8	5.16	88	329	8.15	5.22	1.08	1.12	3.55	1.2	0.97
22	***	male	43	C:C	A:A	70.5	44	26.5	1.7	8.01	76	429	16.07	5.91	2.37	1	3.87	1.22	1.14
23	***	male	52	T:T	A:A	69.8	41.6	28.2	1.5	7.25	78	347	26.7	4.97	1.43	1.01	3.31	0.96	0.92
24	***	male	44	C:C	C:A	64.2	38.2	26	1.5	3.37	79	373	12.29	2.6	1.39	0.74	1.28	0.95	0.53
25	***	female	50	C:C	C:A	69.8	40.1	29.7	1.4	4.44	57	342	8.32	6.9	2.89	0.98	4.89	1.09	1.36
26	***	female	72	C:T	A:A	70.6	41.7	28.9	1.4	6.51	95	424	9.49	5.79	2.53	0.86	3.86	0.98	1.12
27	***	male	62	C:T	A:A	77	51.6	25.4	2	4.92	94	417	13.27	5.35	1.59	1.13	3.51	1.19	1.01
28	***	male	32	C:C	C:A	73.4	48.3	25.1	1.9	5.6	72	409	4.68	5.63	2.23	1.49	3.46	1.37	0.97
29	***	female	61	C:T	A:A	81.8	51.4	30.4	1.7	5.2	52	420	6.42	4.9	2.77	1.58	2.45	1.64	0.82
30	***	male	48	C:C	C:A	57.9	34.9	23	1.5	18.91	543	306	12.45	4.45	1.99	0.56	0.94	0.73	0.44
31	***	male	49	C:T	A:A	62.4	39.6	22.8	1.7	6.85	78	342	21.41	7.97	2.55	1.03	5.39	1.13	1.59
32	***	female	78	C:T	A:A	74.5	36.8	37.7	1	4.96	52	321	7.02	3.26	1	1.02	1.81	1.11	0.58
33	***	male	57	C:C	A:A	47.9	21.8	26.1	0.8	15.37	244	476	10.88	6.93	2.67	1.23	4.51	1.4	1.2
34	***	male	54	T:T	A:A	64.2	39.8	24.4	1.6	4.87	68	242	9.76	4.62	3.27	0.69	2.8	0.84	0.88
35	***	male	57	T:T	A:A								3.35	2.97	0.97	0.92	1.52	0.75	0.64
36	***	female	59	C:T	C:A	61.9	23.7	38.2	0.6	4.19	69	427	3.72	3.92	1.39	0.51	2.47	0.6	0.99
37	***	female	64	T:T	A:A	60.5	35.8	24.7	1.4	6.3	67	433	14.63	4.51	2.62	1.18	2.4	1.47	0.88
38	***	male	41	C:T	C:A	63.1	41.4	21.7	1.9	5	77	457	9.86	5.31	1.55	0.92	3.8	0.96	1.07
39	***	male	53	C:T	C:A	61.6	36.7	24.9	1.5	5.11	52	344	15.56	7.04	3.62	1.03	4.45	1.21	1.35
40	***	female	47	C:C	A:A	70.8	41.3	29.5	1.4	4.2	56	294	8.02	4.41	2	0.74	2.88	0.93	0.92
41	***	female	52	C:C	A:A	63.3	36.1	27.2	1.3				6.98	5.34	0.87	1.13	1.76	1.01	0.52
42	***	male	71	C:T	C:C	76.9	53.7	23.2	2.3	3.95	79	438	14.85	5.56	2.7	1.33	3.65	1.2	1.18
43	***	male	36	C:T	C:A	57.2	38.7	18.5	2.1	4.03	50	249	9.03	3.9	0.62	1.11	2.46	1.07	0.73
44	***	female	41	C:T	A:A								6.78	5.42	1.38	0.97	4	1.03	1.07
45	***	male	56	C:C	A:A	62.7	35.4	27.3	1.3	4.62	60	207	8.91	4.87	1.89	1.3	2.93	1.16	0.91
46	***	female	74	C:C	A:A	65.3	37.4	27.9	1.3	10.59	135	594	5.48	3.53	0.79	1.12	2.03	1.12	0.56
47	***	male	48	C:T	A:A	72.5	48.2	24.3	2	6.36	76	343	7.77	5.67	8.3	0.9	2.39	1.2	1
48	***	female	50	C:T	A:A	57.2	31.6	25.6	1.2	4.05	45	182	8.11	2.42	0.85	0.66	1.45	0.85	0.49
49	***	female	44	C:C	A:A	72.4	43.5	28.9	1.5	4.74	46	296	11.37	5.67	2.24	1.14	3.94	1.21	1.16
50	***	male	61	C:C	C:C	59.9	33.6	26.3	1.3	5.26	93	395	4.23	4.68	1.38	0.85	2.97	0.81	1.1
51	***	female	70	T:T	A:A	64.8	35.1	29.7	1.2				9.25	5.73	2.77	1.07	3.82	1.17	1.07
52	***	female	53	T:T	C:A	73.3	42.8	30.5	1.4	5.88	54	256	11.16	4.77	1.91	1.51	2.71	1.56	0.77
53	***	female	66	C:T	C:A	63.8	38	25.8	1.5	4.69	51	290	6.32	5.35	1.69	0.93	3.91	1.06	1.11
54	***	female	64	T:T	A:A	60.5	35.8	24.7	1.4	6.3	67	433	14.63	4.51	2.62	1.18	2.4	1.47	0.88
55	***	female	65	C:T	C:A	73.2	42.4	30.8	1.4	7.79	52	278	14.13	4.9	1.24	1.37	3.11	1.38	0.91
56	***	female	78	C:T	C:A	74.9	46.7	28.2	1.7	7.41	96	381	16.28	4.7	3.96	1.12	2.57	1.32	0.84
57	***	female	69	C:T	C:A	58.6	33.2	25.4	1.3	9.01	78	396	5.84	3.06	0.81	0.88	1.72	0.95	0.55
58	***	male	47	C:T	C:A	73.9	51.1	22.8	2.2	3.15	51	179	5.41	6.01	2.88	1.17	3.95	1.19	1.14
59	***	female	59	C:T	A:A	63.1	42.7	20.4	2.1	4.02	45	208	5.43	4.25	1.99	1.06	2.62	1.15	0.75
60	***	female	77	C:T	A:A	66.7	40.4	26.3	1.5	3.94	88	292	9.34	4.57	1.42	2.6	1.21	2.2	0.5
61	***	male	60	C:T	A:A	66.4	43.4	23	1.9	6.1	81	466	5.91	3.91	1.23	1.19	2.3	1.18	0.7
62	***	female	57	C:C	C:A	75.8	42.1	33.7	1.2	7.41	47	246	9.28	5.53	1.09	1.67	3.53	1.42	0.94
63	***	female	65	C:C	A:A	75.8	42.4	33.4	1.3	6.02	58	305	6.01	4.66	2.16	1.21	2.78	1.26	0.89
64	***	male	54	C:T	A:A	60.7	35	25.7	1.4	6.96	92	241	9.79	9.04	1.71	1.34	6.95	1.32	1.69
65	***	female	62	C:T	A:A	81.6	47.9	33.7	1.4	5.34	60	237	8.36	6.2	1.41	1.87	3.82	1.78	1.04
66	***	male	56	C:T	A:A	67.3	36.7	30.6	1.2	8.32	76	402	30.35	6.39	1.97	1.12	4.31	1.05	1.27
67	***	male	63	C:T	C:A	64.6	38	26.6	1.4	6.5	82	334	9.01	3.83	1.23	0.81	2.49	0.89	0.82
68	***	female	48	C:T	A:A	67.2	34.6	32.6	1.1	8.84	141	502	7.56	4.53	1.42	0.83	3.03	0.97	0.98
69	***	male	51	T:T	A:A	59.6	41.4	18.2	2.3	5.99	63	272	13.64	6.99	3.39	1.47	4.17	1.52	1.28
70	***	male	52	C:T	A:A	69.6	38.9	30.7	1.3				10.54	5.55	1.62	1.01	3.85	1.06	1.14
71	***	female	42	C:T	A:A	69.3	38.8	30.5	1.3	3.87	60	269	9.87	5.32	2.5	1.02	3.54	1.15	1.12
72	***	female	49	C:C	C:A	69.2	36.2	23	1.6	6.53	44	234	3.97	3.62	1.43	0.94	2.15	1.11	0.72
73	***	female	72	T:T	A:A	65.8	41.1	24.7	1.7	6.23	79	231	4.4	4.39	0.79	1.91	2.06	1.63	0.65
74	***	female	71	C:T	A:A	71.8	43.7	28.1	1.6	10.43	113	410	14.51	5.18	1.83	1.42	3.03	1.31	0.9
75	***	male	52	C:T	A:A	76	37.2	38.8	1	3.55	70	384	14.86	4.62	2.11	1.11	2.73	1.28	0.86
76	***	male	41	T:T	A:A	63.8	38.5	25.3	1.5	2.91	53	202	7.7	4.65	1.63	0.94	3.13	0.91	0.89
77	***	male	53	C:T	C:A	60.8	39.1	21.7	1.8	8.27	58	316	12.8	4.86	1.07	1.02	3.49	0.98	0.96
78	***	female	68	T:T	A:A	61.3	34.9	26.4	1.3	6	64	373	11.84	3.02	1.21	1	1.57	1.07	0.5
79	***	female	75	C:T	A:A	68.5	36.8	31.7	1.2	3.98	51	169	13.15	4.33	1.08	1.71	2.28	1.46	0.7
80	***	male	58	C:C	A:A	64.6	37.2	27.4	1.4	7.82	78	263	5.64	3.83	0.97	1.02	2.49	1.07	0.68
81	***	male	57	C:T	A:A	73.5	44.2	29.3	1.5	4.55	58	304	4.79	5.73	0.85	2.01	3.34	1.55	0.94
82	***	male	53	C:T	A:A	64.5	41.6	22.9	1.8	5	79	364	6.33	3.77	0.98	0.95	2.56	0.98	0.74
83	***	female	47	C:C	A:A	65.7	38.4	27.3	1.4	3.1	44	203	7.31	3.31	1.14	0.97	1.95	0.96	0.61
84	***	female	70	C:T	A:A	81.4	48.5	32.9	1.5	5.04	81	355	7.14	8.17	5.11	1.23	5.21	1.41	1.42
85	***	male	33	C:T	A:A	64.6	39.5	25.1	1.6	4.74	62	368	9.9	6.37	5.62	1	3.72	1.14	1.16
86	***	male	54	T:T	C:C	77.5	49.6	27.9	1.8	6.9	77	403	19.64	5.53	3.69	1.05	3.49	1.18	1.04
87	***	male	66	C:T	C:A	64.5	37.3	27.2	1.1	4.87	93	550	11.26	3.74	0.56	2.16	1.01	1.52	0.41
88	***	male	49	T:T	A:A	61.7	38	23.7	1.6	6.7	67	284	14.61	4.59	1.05	0.93	3.22	0.99	0.93
89	***	male	79	C:C	C:A	67.6	38.9	28.7	1.4	4.67	93	400	9.69	5.22	1.96	0.88	3.66	1	1.08
90	***	female	51	C:C	C:C	75.3	44.1	31.2	1.4				6.62	3.64	0.96	1.43	2.05	1.31	0.63
91	***	female	52	C:T	C:A	70.5	45.6	24.9	1.8	5.88	83	339	11.65	6.15	1.91	0.96	4.43	1.07	1.2
92	***	female	39	C:C	C:C	73.7	46.9	26.8	1.7	4.55	68	433	5.39	5.35	1.24	1.02	3.88	1.03	1.03
93	***	female	49	C:T	A:A	72.1	41.4	30.7	1.3	5.96	57	268	10.42	5.1	1.94	1.09	3.39	1.18	0.94
94	***	male	63	C:T	A:A	64.7	39	25.7	1.5	6.99	77	266	5.95	3.48	0.8	1.1	2.08	1.09	0.6
95	***	male	40	C:C	A:A	73.4	44.1	29.3	1.5	5.17	69	371	9.85	5.69	3.93	1.01	3.47	1.17	1.14
96	***	male	63	C:C	C:A	72.5	41.2	31.3	1.3	2.96	71	363	6.84	6.97	1.57	1.08	5.13	1.11	1.37
97	***	male	57	C:T	A:A	72.9	47.7	25.2	1.9	5.73	83	347	12.61	5.36	2.1	1.02	3.6	1.12	1.15
98	***	male	55	C:C	C:A	63	39.3	23.7	1.7	4.46	72	305	6.95	4.06	2.2	1.06	2.39	1.15	0.76
99	***	male	60	C:T	A:A	68.9	42.8	26.1	1.6	5.16	65	371	6.72	4.87	1.65	0.96	3.34	1.02	0.91
100	***	male	47	C:C	C:A	78.5	48.2	30.3	1.6	5.55	80	334	4.82	6.72	1.19	1.66	4.72	1.36	1.23
101	***	male	67	C:T	A:A	72.8	43	29.8	1.4	5.85	76	331	15.39	5.72	6.17	0.91	2.81	1.25	0.9
102	***	male	69	C:T	A:A	69.5	39.6	29.9	1.3	5.2	83	306	6.05	4.96	0.98	1.23	1.45	1.15	0.51
103	***	male	32	C:T	A:A	74	48.5	25.5	1.9	4.71	72	248	11.13	4.18	0.93	0.89	2.81	0.93	0.85
104	***	male	81	C:C	A:A	63.3	33.2	30.1	1.1	5.29	89	341	11.87	3.15	0.89	1.07	1.91	0.98	0.57
105	***	female	54	C:T	C:A	64.1	39.4	24.7	1.6	4.08	82	268	7.29	3.18	1.93	0.66	1.86	0.83	0.68
106	***	female	54	C:C	A:A	75.7	49.6	26.1	1.9	5.91	68	320	7.1	6.52	1.17	1.75	4.12	1.44	1.12
107	***	female	78	T:T	A:A	59.2	31.6	27.6	1.1	4.6	64	151	18.08	4.9	1.24	0.83	1.64	1.09	0.59
108	***	male	78	C:T	A:A	73.2	41.7	31.5	1.3	10	97	424	15.51	4.56	1.5	1	3.18	1.02	0.92
109	***	male	43	C:T	C:A	67.2	37.8	29.4	1.3	5.26	77	177	8.56	6.18	1.5	0.93	4.52	0.83	1.24
110	***	male	63	C:C	C:A	66.3	41.7	24.6	1.7	4.22	59	298	11.56	4.28	1	1.24	2.56	1.14	0.79
111	***	male	81	C:T	C:A	67.5	39.9	27.6	1.4	3.48	84	346	9.34	5.39	1.92	1.53	3.31	1.4	0.93
112	***	female	29	C:T	C:A	68.5	41.1	27.4	1.5	6.13	53	182	15.28	4.23	1.3	1.28	2.57	1.22	0.7
113	***	male	51	C:T	C:A	83.4	45.8	37.6	1.2	7.05	91	474	12.05	5.97	4.84	1.22	3.54	1.34	1.08
114	***	male	61	C:C	C:A	67.9	39.4	28.5	1.4	5.82	63	232	8.94	4.06	1.58	1.21	2.37	1.24	0.68
115	***	male	42	C:C	A:A	67.5	38.7	28.8	1.3	6.5	77	274	15.31	4.67	1.62	1.09	2.98	1.05	0.93
116	***	male	33	C:C	A:A	65.6	42.6	23	1.9	4.05	77	283	10.62	6.23	10.07	0.69	1.94	0.78	0.84
117	***	male	67	T:T	A:A	65.3	40	25.3	1.6	5.84	80	366	5.6	5.36	1.66	1.09	3.66	1.14	1.05
118	***	female	67	C:T	C:A	71.8	44.7	27.1	1.6	4.22	51	201	5.45	4.68	0.83	1.22	1.19	1.24	0.44
119	***	female	54	C:T	A:A	65.4	31.3	34.1	0.9	10.71	145	540	11.6	7.5	1.46	3.04	4.37	2.33	1.14
120	***	male	62	C:C	C:A	75.5	45.3	30.2	1.5	5.6	71	358	7.65	4.39	0.79	1.16	2.93	1.14	0.81
121	***	female	72	C:C	C:A	52.7	25.4	27.3	0.9	24.57	324	394	10.19	7.92	0.85	2.62	4.87	1.89	1.19
122	***	male	40	C:T	A:A	57.2	30.5	26.7	1.1	3.17	72	232	13.89	3.31	1.71	0.51	1.98	0.55	0.75
123	***	male	56	C:C	C:A	80.7	48	32.7	1.5	4.99	70	357	5.6	5.1	3.11	1.14	3.25	1.18	0.93
124	***	male	42	T:T	C:A	63.8	36	27.8	1.3	6.87	77	364	19.06	5.07	1.9	0.94	3.4	1.03	0.9
125	***	female	48	T:T	A:A	66.5	39.1	27.4	1.4	5.78	56	189	10.08	5.24	1.94	1.2	3.43	1.23	1.03
126	***	male	58	C:T	A:A	76.8	47.5	29.3	1.6	4.21	65	283	7.67	4.57	2.14	0.79	3.01	0.94	0.93
127	***	male	43	C:T	C:A	73.4	44.5	28.9	1.5	2.94	57	319	14.4	4.85	1.69	1.27	2.97	1.31	0.91
128	***	female	42	C:T	A:A	81.7	49.6	32.1	1.5	4.67	62	331	15.29	6.38	3.76	1.12	4.24	1.26	1.31
129	***	male	33	C:T	A:A	64.6	39.5	25.1	1.6	4.74	62	368	9.9	6.37	5.62	1.19	3.72	1.25	1.16
130	***	male	74	T:T	A:A	72.9	40.3	32.6	1.2	5.81	63	276	13.05	6.2	1.21	1.18	4.43	1.18	1.26
131	***	female	54	C:T	C:A	72.8	42.1	30.7	1.4	4.1	55	279	12.86	5.57	1.7	1.3	3.77	1.28	1.07
132	***	female	55	C:T	A:A	73.9	41.9	32	1.3	7.43	84	577	4.02	5.67	0.9	1.25	2.13	1.11	0.66
133	***	female	55	C:T	C:A	68.3	44.3	24	1.8	4.39	72	470	5.17	3.01	1.29	0.94	1.75	1.02	0.57
134	***	female	74	T:T	A:A	69.8	36	33.8	1.1	5.89	52	215	7.53	6.02	2.04	1.01	4.19	1.09	1.14
135	***	female	42	C:T	C:A	75.2	43.7	31.5	1.4	7.32	57	382	12.78	5.42	6.89	0.83	2.78	1.16	1.04
136	***	male	81	C:C	A:A	82	46.2	35.8	1.3	10.05	205	467	7.66	5.69	2.93	1.46	3.49	1.45	1.04
137	***	male	78	C:T	A:A	78	45.3	32.7	1.4	6.04	69	379	13.33	2.59	1.1	0.93	1.35	0.95	0.5
138	***	male	55	C:T	A:A	69.8	33.6	36.2	0.9	10.32	188	408	9.27	3.28	0.49	1.68	1.56	1.33	0.47
139	***	male	70	C:C	A:A	67	33.7	33.3	1	7.55	99	337	9.97	6.42	2.04	1.29	4.47	1.34	1.31
140	***	female	71	C:C	C:A	76	44.8	31.2	1.4	4.95	47	425	10.48	4.29	1.79	1.25	2.69	1.3	0.86
141	***	male	58	C:C	A:A	76.6	47.3	29.3	1.6	8.3	84	264	8.54	4.64	3.13	0.98	2.78	1.26	0.84
142	***	male	71	C:T	A:A	52.5	28.3	24.2	1.2	11.58	78	218	10.24	3.67	1.88	1.21	1.99	1.15	0.74
143	***	female	81	C:C	C:A	64.2	38.2	26	1.5	4.33	68	379	4.64	4.49	0.82	1.52	2.72	1.39	0.79
144	***	female	58	C:T	A:A	77.6	41.4	36.2	1.1	6.35	57	207	12.78	5.86	2.72	1.29	3.81	1.33	1.01
145	***	male	60	C:T	C:A	80.1	49.6	30.5	1.6	7.09	84	350	9.62	6.2	2.49	1.18	4.28	1.2	1.24
146	***	male	36	C:C	A:A	66.5	43.7	22.8	1.9	5.09	74	356	12.04	5.81	9.92	0.58	2.02	0.77	0.7
147	***	female	51	T:T	A:A	72.7	42.9	29.8	1.4	5.84	57	313	11.31	7.75	4.35	1.19	5.02	1.38	1.25
148	***	female	58	C:T	A:A	71.6	39.5	32.1	1.2	3.42	53	288	12.72	6.09	4.44	1.07	3.81	1.26	1.08
149	***	male	62	C:T	A:A	75	23.6	51.4	0.5	8.74	116	668	11.54	4.16	1.36	0.36	1.07	0.66	0.45
150	***	male	42	C:T	A:A	62.7	33.5	29.2	1.1	12.61	245	491	11.65	3.92	1.17	0.96	2.66	0.98	0.68
151	***	female	58	T:T	A:A	74	43.6	30.4	1.4	3.21	47	270	6.7	4.83	1.98	1.3	3.1	1.36	0.85
152	***	male	50	T:T	A:A	62.1	40.5	21.6	1.9	6.1	60	303	8.6	1.87	0.72	0.75	0.9	0.93	0.32
153	***	female	55	C:T	C:A	71.2	40.3	30.9	1.3	8.15	43	473	7.8	5.65	2.04	1.16	3.97	1.17	1.06
154	***	male	53	C:C	A:A	70.7	40.4	30.3	1.3	6.02	66	243	7.45	6.16	1.69	1.11	4.56	1.07	1.24
155	***	female	34	C:T	A:A	77	45.5	31.5	1.4	3.7	53	326	10.29	5.99	2.61	1.13	4.27	1.15	1.09
156	***	male	54	T:T	A:A	78.8	48.3	30.5	1.6	4.91	99	402	6.04	3.37	1.33	1.12	1.88	1.15	0.64
157	***	male	45	C:C	A:A	67.8	40.4	27.4	1.5	6.72	95	371	6.38	3.56	1.76	0.99	2.29	1.11	0.68
158	***	female	49	C:T	A:A	72.8	40.5	32.3	1.3	5.06	54	311	6.9	5.94	2.36	1.25	4.08	1.33	1.08
159	***	female	55	C:C	C:A	79.1	49.7	29.4	1.7	8.25	74	391	7.05	4.52	1.96	1.49	2.62	1.39	0.77
160	***	male	49	C:C	A:A	76.1	47.2	28.9	1.6	6.8	70	327	7.7	3.14	1.54	1.07	1.8	1.11	0.57
161	***	male	56	C:C	A:A	70.3	37.6	32.7	1.1	8.49	208	503	5.32	7.2	1.46	1.33	5.35	1.2	1.38
162	***	male	57	C:C	C:A	64.4	43.5	20.9	2.1	7.43	69	331	10.46	4.94	1.13	1.32	3.13	1.26	0.91
163	***	male	41	C:T	A:A	63	37.3	25.7	1.5	4.08	53	321	15.54	4.97	13.26	0.53	0.89	0.94	0.7
164	***	female	69	C:T	A:A	77.9	45.4	32.5	1.4	4.25	68	240	10.74	7.27	2.25	1.41	4.74	1.35	1.28
165	***	male	62	C:T	A:A	75	23.6	51.4	0.5	8.74	116	668	11.54	4.16	1.36	0.36	1.07	0.66	0.45
166	***	female	69	C:C	A:A	67.8	39.1	28.7	1.4	4.56	64	392	3.86	2.68	1.08	1.03	1.11	1.05	0.4
167	***	female	54	T:T	A:A	66.8	44.5	22.3	2	6.94	63	381	6.34	5.02	1.35	1.06	3.27	1.08	0.88
168	***	female	63	C:C	C:A	66.8	38.4	28.4	1.4	5.94	80	569	4.58	6.89	5.52	2.3	2.71	2.03	1.09
169	***	male	53	T:T	A:A	66.8	38.4	28.4	1.4	5.94	80	569	4.58	6.89	5.52	2.3	2.71	2.03	1.09
170	***	female	59	C:T	C:A	65.5	30.3	35.2	0.9	4.79	84	396	6.43	4.37	1.49	0.89	2.65	0.96	0.81
171	***	male	55	C:C	A:A	60.1	32.4	27.7	1.2	5.17	106	442	5.31	4.77	1.18	1.61	2.51	1.49	0.73
172	***	male	53	C:C	C:A	68.6	39.8	28.8	1.4	3.94	63	401	8.73	4.18	2.05	0.87	2.46	1.01	0.77
173	***	female	33	C:C	A:A	66.9	36.6	30.3	1.2	4.84	54	220	5.65	6.51	7.95	0.81	2.83	1.13	1.06
174	***	female	55	C:C	C:A	71.1	43	28.1	1.5	3.8	49	440	6.68	5.02	3.54	1.6	2.06	1.67	0.7
175	***	female	51	C:C	C:A	70.3	38.7	31.6	1.2	6.57	53	286	6.66	5.96	2.19	0.91	4.02	1.1	1.06
176	***	female	69	C:C	A:A	67.6	37.6	30	1.3	9.1	69	329	7.51	4.7	1.28	1.83	2.2	1.59	0.63
177	***	male	46	C:T	A:A	79.5	47.8	31.7	1.5				5.2	3.33	1.49	0.61	1.94	0.96	0.64
178	***	female	53	C:C	A:A	80.9	50.7	30.2	1.7	7.16	45	379	11.83	4.72	3.6	0.91	2.38	1.24	0.82
179	***	female	44	T:T	A:A	66.1	39.6	26.5	1.5	4.44	47	371	4.87	3.43	0.97	0.91	1.89	1.03	0.6
180	***	male	46	C:T	A:A	76.4	46.1	30.3	1.5	4.76	80	262	7.92	4.88	1.11	1.3	2.82	1.22	0.82
181	***	male	57	C:C	A:A	73.5	42.3	31.2	1.4	5.63	83	485	7.87	5.32	1.76	0.73	3.57	1.02	1.02
182	***	female	54	C:T	C:A	72.8	42.1	30.7	1.4	4.1	55	279	12.86	5.57	1.7	1.3	3.77	1.28	1.07
183	***	male	71	C:C	C:C	76.3	40.3	36	1.1	8.46	168	507	3.3	2.82	0.98	1.05	1.12	1.1	0.49
184	***	female	75	C:C	A:A	74.3	43.3	31	1.4	5.39	51	252	11.31	5.02	2.24	1.51	2.55	1.64	0.78
185	***	male	57	C:C	A:A	67.9	39.3	28.6	1.4	4.05	98	216	7.61	4.58	1.3	1.07	2.72	1.05	0.78
186	***	male	64	C:C	C:A	57.9	33.6	24.3	1.4	5.04	63	207	9.27	6.28	3.44	1.36	4.23	1.3	1.25
187	***	male	78	C:T	A:A	61.6	33.6	28	1.2	6.29	82	207	8.84	3.54	1.32	1.03	1.78	0.98	0.71
188	***	male	69	C:T	A:A	51.3	21.7	29.6	0.7	8.45	90	193	6.89	3.13	0.76	0.69	1.78	0.69	0.64
189	***	male	58	C:T	A:A	71.1	42.7	28.4	1.5				6.48	4.96	1.12	1.21	3.41	1.16	0.94
190	***	male	41	C:T	A:A	76.8	48.6	28.2	1.7	4.93	106	363	9.95	4.7	1.54	0.9	3.03	1.22	0.93
191	***	female	60	C:T	A:A	68.2	39.1	29.1	1.3	3.2	64	248	10.64	7.45	2.34	1.1	5.19	1.16	1.42
192	***	female	56	C:T	A:A	57.1	36.7	20.4	1.8				10.18	3.15	0.93	1.49	1.22	1.36	0.41
193	***	male	61	C:C	A:A	70.5	43.8	26.7	1.6	8.9	93	466	9.22	4.17	1.65	0.94	2.52	1.07	0.77
194	***	male	61	C:T	A:A	80.1	48.8	31.3	1.6	9.27	62	356	13.85	5.85	2.12	1.02	3.77	1.21	1.16
195	***	male	47	C:C	C:A	85.1	51.1	34	1.5	6.86	131	483	9.11	4.38	1.49	1.13	2.63	1.21	0.76
196	***	male	50	C:C	C:A	79.2	44.8	34.4	1.3	13.46	172	632	8.51	5.57	3.23	0.78	3.37	0.94	1.01
197	***	female	73	C:C	A:A	77.2	47.2	30	1.6	6.78	71	434	6.75	4.18	2.48	1.43	3.64	1.41	1.07
198	***	male	38	C:T	C:A	76	46.9	29.1	1.6	4.27	63	486	6.89	4.98	8.15	0.77	1.5	1.12	0.75
199	***	female	55	C:T	A:A	67.9	40.8	27.1	1.5	4.13	53	215	5.55	2.76	1.19	0.88	1.32	1.07	0.48
200	***	male	55	C:C	A:A	60.1	32.4	27.7	1.2	5.17	106	442	5.31	4.77	1.18	1.61	2.51	1.49	0.73
201	***	male	53	C:C	C:A	68.6	39.8	28.8	1.4	3.94	63	401	8.73	4.18	2.05	0.87	2.46	1.01	0.77
202	***	male	38	C:C	C:A	71.5	42.8	28.7	1.5	5.89	51	325	10.93	4.35	2.99	0.76	2.43	1.06	0.85
203	***	male	55	C:C	A:A	74.4	47.6	26.8	1.8	6.62	93	331	8.39	3.72	1.61	0.96	1.99	1.12	0.71
204	***	male	61	T:T	A:A	61.5	35.8	25.7	1.4	4.09	62	215	9.58	4.09	3.09	1.11	1.72	1.32	0.72
205	***	male	70	C:T	A:A	66.5	35	31.5	1.1	7.57	91	271	10.72	5.19	1.4	1.28	2.87	1.24	0.83
206	***	male	51	C:T	A:A	77.2	46.2	31	1.5	7.62	80	417	8.66	5.48	1.9	1.02	3.56	1.23	1.03
207	***	male	55	C:T	A:A	74.8	44.7	30.1	1.5	4.57	75	408	8.25	4.33	1.27	0.95	2.65	1.2	0.79
208	***	female	48	C:C	C:A	62	29.1	32.9	0.9	8.18	155	360	9.32	5.52	2.42	0.88	3.4	1.07	1.05
209	***	male	74	C:T	C:A	77.9	42.7	35.2	1.2	7.1	106	430	10.16	4.03	1.74	0.93	2.4	1.14	0.76
210	***	female	76	C:T	C:A	72.1	44	28.1	1.6	8.11	63	354	8.17	3.36	0.7	1.66	1.26	1.54	0.48
211	***	male	77	C:C	C:A	60.7	40.2	20.5	2	3.27	78	253	3.53	5.02	0.9	1.55	2.59	1.39	0.76
212	***	male	65	C:T	A:A	74.4	47	27.4	1.7	5.78	71	296	7.45	4.48	0.9	1.57	2.38	1.38	0.71
213	***	male	49	C:T	C:A	69.2	43.4	25.8	1.7	4.87	70	422	13.26	4.21	1.21	0.84	2.66	1.18	0.82
214	***	male	43	C:T	C:C	66.6	38.9	27.7	1.4	6.66	69	250	14.32	4.71	1.43	0.76	3.07	1	0.91
215	***	female	67	C:C	A:A	63.6	36.1	27.5	1.3	9.69	124	380	11.95	4.95	2.6	1.03	3.11	0.92	0.93
216	***	female	55	C:T	C:A	77	43.3	33.7	1.3	3.95	52	301	6.68	3.62	0.83	1.7	1.45	1.43	0.52
217	***	male	66	C:T	C:A	72.7	42.6	30.1	1.4	10.95	210	408	6.29	6.53	2.14	0.97	4.34	1.21	1.21
218	***	male	46	C:C	C:A	57.2	29.7	27.5	1.1	6.35	90	357	2.8	4.04	1.19	1.22	2.16	1.25	0.63
219	***	male	42	C:T	A:A	67.7	32.1	35.6	0.9	9.33	139	532	8.15	5.76	2.23	1.16	3.53	1.2	0.97
220	***	male	81	C:T	A:A	59.1	35.2	23.9	1.5	4.07	75	384	8.19	5.23	1.3	1.05	3.49	1.04	0.93
221	***	female	65	C:C	C:A	75.4	40.6	34.8	1.2	4.31	45	278	8.06	3.94	0.9	1.4	2	1.46	0.61
222	***	female	57	C:C	A:A	77.1	46.8	30.3	1.5	4.16	36	362	5.81	5.64	1.8	1.2	3.48	1.29	0.97
223	***	male	38	C:T	C:A	69.3	40.7	28.6	1.4	4.01	62	330	15.25	4.01	4.01	0.73	1.86	0.92	0.67
224	***	male	51	C:T	A:A	76.3	50	26.3	1.9	5.7	74	348	6.82	4.78	1.06	1.32	2.9	1.25	0.83
225	***	female	60	C:T	A:A	63.4	35.9	27.5	1.3	4.86	53	304	5.89	4.04	1.11	1.4	2.11	1.25	0.66
226	***	male	24	C:T	C:A	79.6	46	33.6	1.4	4.75	53	363	13.05	5.21	1.4	1.36	3.16	1.41	0.9
227	***	female	52	C:C	C:A	70.8	41.4	29.4	1.4	5.82	58	351	7.8	4.69	2.31	1.03	2.84	1.08	0.88
228	***	male	74	C:T	C:A	69.3	41.9	27.4	1.5	3.57	63	469	7.23	3.25	2.57	0.9	1.52	1.13	0.52
229	***	female	70	C:C	C:C	71.5	43.5	28	1.6	5.92	59	208	8.4	4.75	1.49	1.25	2.95	1.41	0.84
230	***	female	50	C:T	C:A	73.7	45.7	28	1.6	6.02	35	229	13.05	5.79	2.55	1.16	3.77	1.18	1.01
231	***	female	63	C:T	C:A	69.9	38.5	31.4	1.2	17.55	382	478	9.68	3.26	1.48	1.04	1.71	1.29	0.59
232	***	female	63	T:T	A:A	72.6	43.5	29.1	1.5	4.52	60	358	6.24	4.85	1.86	1.29	2.91	1.25	0.8
233	***	male	55	C:C	A:A	74.4	47.6	26.8	1.8	6.62	93	331	8.39	3.72	1.61	0.96	1.99	1.12	0.72
234	***	female	52	T:T	A:A	66	37.9	28.1	1.3	5.97	49	262	8.02	4.09	2.67	1.04	2.3	1.23	0.74
235	***	male	40	C:T	C:A	78.4	40	38.4	1	6.31	80	348	14.39	4.04	1.92	0.79	2.27	0.92	0.62
236	***	female	69	C:C	A:A	77.5	38.6	38.9	1	7.23	82	369	5.35	3.23	1.6	0.87	1.59	1	0.46
237	***	male	53	C:C	C:A	71.1	41.8	29.3	1.4	7.24	78	335	11.23	6.28	5.83	0.69	3.41	1.02	1.11
238	***	female	66	T:T	A:A	71.2	43.9	27.3	1.6	3.56	55	419	7.79	6.24	2.79	1.23	4.07	1.33	1.15
239	***	female	48	C:C	C:A	72.7	40.9	31.8	1.3	4.12	65	220	8.92	4.67	2.78	1.34	2.46	1.36	0.79
240	***	female	56	C:C	A:A	85.9	51	34.9	1.5	3.73	46	251	9.49	6.45	3.61	1.45	3.72	1.57	1.06
241	***	female	57	C:T	C:A	73.9	36.9	37	1	4.07	56	197	7.59	6.7	4.76	1.06	3.99	1.48	1.28
242	***	female	39	T:T	A:A	78.2	46.4	31.8	1.5	4.53	34	276	17.29	4.11	5.03	0.88	1.68	1.39	0.68
243	***	female	70	C:C	A:A	79.1	45.6	33.5	1.4	8.31	77	293	9.42	6.95	2.4	1.51	4.4	1.56	1.22
244	***	male	37	T:T	A:A	64.9	41	23.9	1.7	3.92	75	399	4.71	4.02	2.61	0.65	2.45	0.81	0.73
245	***	female	58	C:T	A:A	81.9	49.4	32.5	1.5	5.45	48	219	10.15	8.15	1.82	1.38	5.7	1.32	1.45
246	***	male	57	C:C	C:A	91.4	35.8	55.6	0.6	6.23	88	363	10.51	4.47	1.55	1.3	2.39	1.24	0.77
247	***	female	55	C:T	A:A	81.1	47.6	33.5	1.4	6.04	60	379	8.66	5.18	1.8	1.58	2.85	1.56	0.86
248	***	female	57	C:C	A:A	80.8	43.7	37.1	1.2	6.45	43	332	9.17	6.18	1.24	1.75	3.79	1.61	1.04
249	***	female	59	C:T	A:A	74.1	48.1	26	1.9	5.96	52	219	6.11	4.34	1.22	1.56	2.29	1.48	0.73
250	***	male	79	T:T	A:A	57.9	36.4	21.5	1.7	9.42	92	306	7.43	4.04	1.1	1.35	2.06	1.28	0.68
251	***	male	68	C:C	C:C	65.5	35.1	30.4	1.2	20.93	483	546	7.88	2.7	0.65	0.61	1.64	0.72	0.5
252	***	male	64	C:T	A:A	69.3	41.6	27.7	1.5	7.64	100	499	3.18	3.01	0.95	0.92	1.56	1	0.52
253	***	female	76	C:T	A:A	67.2	40	27.2	1.5	6.88	71	359	9.9	6.2	1.59	1.19	3.92	1.33	1.09
254	***	male	56	C:C	C:A	60.9	33.6	27.3	1.2	8.81	124	545	9.9	5.74	2.04	1.28	3.56	1.36	1.06
255	***	female	51	C:C	A:A	80.5	46.4	34.1	1.4	4.58	52	167	7.53	4.2	2.81	1.05	1.75	1.17	0.64
256	***	male	42	C:T	A:A	77	41.8	35.2	1.2	3.7	67	249	12.67	5.13	1.36	1.22	3	1.14	0.96
257	***	male	53	C:T	C:A	63.5	41	22.5	1.8	4.85	83	390	5.67	5.56	1.29	1.3	2.99	1.25	0.86
258	***	male	62	C:C	C:A	73.6	47.1	26.5	1.8	9.88	69	422	5.96	4.32	1.58	0.92	2.53	1.01	0.75
259	***	female	57	C:T	A:A	77.3	45.1	32.2	1.4	6.46	62	359	16.87	8.82	11.22	1.15	4	1.39	1.38
260	***	male	36	C:C	C:A	79.6	45	34.6	1.3	3.04	45	261	15.26	6.04	2.83	0.99	3.7	1.09	1.12
261	***	male	37	C:C	C:A	73.2	33	40.2	0.8	0.58	52	285	9.49	3.99	3.23	0.4	1.98	0.68	0.84
262	***	female	65	C:C	A:A	76.2	40.5	35.7	1.1	4.51	56	217	10.18	4.6	1.27	1.12	2.62	1.2	0.76
263	***	male	51	C:C	C:A	71.8	47.2	24.6	1.9	5.05	72	353	8.85	5.36	1.38	1.21	3.13	1.32	0.84
264	***	female	54	C:T	A:A	77.1	41.3	35.8	1.2	7.08	62	320	14.53	6.61	1.42	1.67	3.76	1.65	1.05
265	***	male	43	C:T	A:A	65.8	43.4	22.4	1.9	6.23	89	272	12.76	5.45	2	0.83	3.36	1	0.95
266	***	male	63	C:T	C:A	77.7	43.7	34	1.3	4.59	57	364	6.15	5.28	1.99	1.03	3.21	1.23	0.93
267	***	female	56	C:C	A:A	78.1	32.4	45.7	0.7	9.84	52	215	5.2	4.41	1.09	1.02	3.04	1.01	0.96
268	***	female	65	C:T	A:A	76.3	44.7	31.6	1.4	6.25	16	436	5.68	3.58	2.9	0.91	1.28	1.27	0.48
269	***	male	72	C:C	C:A	70	38.9	31.1	1.3	4.99	72	309	10.38	4.38	2.16	1.11	2.29	1.09	0.71
270	***	female	55	T:T	C:C	63.4	31.4	32	1	13.05	187	386	25.9	5.67	2.38	1.82	2.84	1.32	0.97
271	***	male	43	C:T	C:A	67.9	46.7	21.2	2.2	5.5	51	371	12.74	4.99	4.92	0.99	2.69	1.13	0.84
272	***	male	33	C:T	C:A	72.2	45.6	26.6	1.7	5.01	70	362	13.02	5.22	2.28	0.69	3.44	1	1.04
273	***	female	67	C:T	C:A	67.9	38.5	29.4	1.3	5.02	63	290	7.87	5.46	2.84	1.43	3.11	1.38	0.95
274	***	male	94	T:T	A:A	54.2	30.9	23.3	1.3	5.41	81	199	3.36	3.21	0.58	1.42	1.29	1.08	0.48
275	***	male	52	C:T	A:A	69.7	45.2	24.5	1.8	5.22	66	444	13.16	6.74	4.81	1.13	3.38	1.12	1.2
276	***	female	52	C:T	C:A	64.4	40.2	24.2	1.7				5.94	6.82	2.52	1.92	3.93	1.53	1.21
277	***	female	48	C:T	C:A	52.3	29	23.3	1.2	3.64	37	341	14.1	7.42	2.61	1.68	4.58	1.36	1.5
278	***	female	57	C:C	C:A	63.3	40.6	22.7	1.8	6.32	64	321	8.5	6.63	2.47	1.3	4.45	1.04	1.29
279	***	female	58	C:T	C:A	69.7	34	35.7	1	7.95	82	429	21.44	3.86	1.27	0.98	2.28	0.9	0.83
280	***	male	60	T:T	C:A	61.1	25.4	35.7	0.7	6.51	49	225	9.38	3.35	1.27	0.78	1.8	0.85	0.85
281	***	female	56	C:T	A:A	64.4	38.7	25.7	1.5	6.58	74	384	8.05	6.5	2.47	1.03	3.8	0.91	1.18
282	***	male	45	C:C	C:A	75.9	44.7	31.2	1.4	4.38	95	295	6.9	5.67	0.82	1.99	3.39	1.42	0.97
283	***	male	46	C:T	C:A	72.4	48.1	24.3	2	7.93	84	517	8.39	5.44	4.28	1.46	2.89	1.3	1.04
284	***	male	48	C:T	A:A	72.2	45.9	26.3	1.7	3.95	72	260	12.44	9.15	7.94	1.15	5.09	0.92	1.51
285	***	female	67	C:T	C:A	58	35.3	22.7	1.6				6.54	5.61	0.68	2.45	2.9	1.42	0.89
286	***	female	62	C:T	A:A								5.69	7.03	1.29	1.68	4.55	1.25	1.33
287	***	male	63	T:T	C:A	64.4	41.7	22.7	1.8	5.32	72	365	8.25	4.29	1.38	1.63	2.24	1.25	0.75
288	***	female	58	C:T	A:A	63.7	40.8	22.9	1.8	6.09	51	282	6.19	6.14	2.62	1.21	3.78	1.11	1.18
289	***	male	59	C:C	C:A	65.3	40.5	24.8	1.6	5.64	70	367	7.91	3.22	3.73	0.92	1.24	0.94	0.62
290	***	male	53	T:T	A:A	62.3	40	22.3	1.8	5.81	80	290	18.23	7.14	3.21	0.98	5.16	0.88	1.47
291	***	male	42	C:T	A:A	56.6	35.4	21.2	1.7	8.28	104	416	27.23	5.09	1.31	1.24	3.07	0.94	1.02
292	***	male	68	T:T	A:A	59.2	38.3	20.9	1.8	2.52	65	350	7.27	4.31	1.73	0.66	2.78	0.66	0.97
293	***	male	57	C:T	A:A	74.8	45.2	29.6	1.5	6.4	59	274	12.7	6.3	2.2	1.27	3.69	1.08	1.23
294	***	female	34	C:C	A:A	67.4	38.5	28.9	1.3	3.99	40	240	7.99	5.48	1.61	1.72	2.87	1.45	1
295	***	male	64	T:T	A:A	57.4	35.4	22	1.6	6.13	73	294	4.91	5.03	0.68	1.76	2.77	1.2	0.87
296	***	male	53	C:T	A:A	57	34.5	22.5	1.5	7.1	107	426	6.88	4.17	1.28	1.18	2.24	0.94	0.81
297	***	male	57	T:T	A:A	59.7	37.5	22.2	1.7	6.14	86	503	6.36	5.26	1.39	1.45	2.86	1.12	0.94
298	***	female	45	T:T	C:A	67.3	42.8	24.5	1.7	7.95	69	187	11.3	4.84	1.27	0.99	3.12	0.96	0.96
299	***	male	79	C:C	A:A	57.9	36.5	21.4	1.7	7.19	86	247	8.72	5.66	1.53	1.18	3.29	1.04	1.1
300	***	male	52	T:T	A:A	58.6	35.9	22.7	1.6	8.37	62	256	11.38	5.13	1.04	1.46	3.04	1.11	0.98
301	***	female	63	T:T	A:A	73.2	45.8	27.4	1.7	5.95	55	275	9.35	6.2	2.1	1.79	3.34	1.54	1.12
302	***	male	56	C:T	C:A	60.9	39.7	21.2	1.9	7.35	68	276	10.56	5.28	2.06	1.17	3	1.07	1.05
303	***	male	71	C:C	A:A	57.9	36.2	21.7	1.7				8.19	5.32	1.81	1.33	3.2	1.08	1
304	***	male	55	C:T	A:A	70.3	42.3	28	1.5	5.62	91	402	13.87	5.95	2.1	1.01	3.8	0.99	1.27
305	***	female	61	C:T	C:A	73.9	42.9	31	1.4	5.91	48	255	13.11	5.25	3.58	1.25	2.65	1.27	0.89
306	***	female	80	C:T	C:C	53.4	35	18.4	1.9	5.4	54	267	12.34	3.31	0.99	0.99	1.75	0.79	0.64
307	***	male	47	C:T	C:A	66.9	41.8	25.1	1.7	6.58	15	424	8.93	5.22	1.33	1.31	2.95	1	0.96
308	***	male	55	T:T	A:A	67.2	43.7	23.5	1.9	8.55	169	591	10.68	6.63	3.53	0.93	3.77	0.79	1.26
309	***	female	59	T:T	A:A	62.8	36.8	26	1.4	2.99	56	257	9.63	3.96	1.66	1.23	2	0.96	0.68
310	***	female	48	C:C	A:A	65.9	36.8	29.1	1.3	5.16	55	340	8.21	5.09	0.94	0.94	3.27	0.84	1.02
311	***	female	45	C:T	A:A	63.7	36.5	27.2	1.3	3.17	49	349	8.4	4.84	2.5	0.87	2.79	0.9	0.98
312	***	female	54	C:T	C:A	74.4	43.6	30.8	1.4	5.15	61	200	9.02	5.5	1.01	1.21	3.2	1.06	1.04
313	***	male	43	C:T	A:A	62.7	42.2	20.5	2.1	7.63	69	403	11.31	5.2	2.63	1.31	2.31	1.37	0.83
314	***	male	46	C:T	A:A	71.6	44.1	27.5	1.6	4.73	84	336	8.72	4.86	1.16	1.33	2.74	1.16	0.9
315	***	male	51	C:C	C:A	61.3	36.9	24.4	1.5	6.24	73	626	6.67	3.31	0.89	1.08	1.56	0.83	0.62
316	***	male	41	C:C	A:A	69.7	38.8	30.9	1.3	6.14	61	308	10.78	4.05	1.51	0.98	2.37	0.96	0.81
317	***	female	78	T:T	A:A	54.3	34.6	19.7	1.8	6.66	62	331	10.89	2.51	1.28	1.1	0.9	1.03	0.43
318	***	male	59	C:T	C:A	60.4	36.8	23.6	1.6	6.8	85	471	7.03	5.72	2.72	0.76	3.32	0.78	1.12
319	***	female	72	C:T	C:A	50.6	24.9	25.7	1	15.07	181	574	18.46	4.65	2.03	0.38	2.45	0.44	1.02
320	***	male	52	C:C	A:A	58.9	35	23.9	1.5	5.28	74	341	15.97	5.37	1.47	0.9	3.32	0.86	1.15
321	***	male	78	C:T	A:A	57.6	34.2	23.4	1.5	6.19	84	309	11.29	2.69	0.78	1.04	1.21	0.85	0.48
322	***	male	50	C:C	A:A	57.3	23.7	33.6	0.7	13.31	146	292	11.89	4.02	0.76	0.92	2.45	0.86	0.95
323	***	female	60	C:T	C:C	64.7	39.3	25.4	1.5	5.96	82	346	13.4	4.56	2.06	1.24	1.34	1.09	0.89
324	***	male	45	C:T	A:A	57.8	36.2	21.6	1.7	4.89	75	377	6.63	5.97	1.44	1.12	3.66	0.92	1.25
325	***	male	45	C:C	A:A	70.4	46.1	24.3	1.9	5.7	59	280	13.99	5.62	0.87	1.4	3.34	1.17	1.1
326	***	male	30	C:C	C:A	63.6	42.1	21.5	2	6.09	67	322	16.79	7.54	17.15	1.01	1.92	1.03	1
327	***	female	56	T:T	A:A	63.7	36.3	27.4	1.3	8.26	54	303	9.47	5.53	3.83	1.26	2.84	1.12	1.01
328	***	male	58	C:T	C:A	61.7	35.8	25.9	1.4	9.23	98	552	10.25	5.1	1.97	1.16	2.88	1.06	1.03
329	***	female	58	T:T	C:A	66.8	31.5	35.3	0.9	7.11	67	414	19.28	6.13	3.49	0.77	3.61	0.81	1.43
330	***	male	37	C:T	A:A	64.3	35.9	28.4	1.3	6.05	50	405	7.17	7.29	17.7	0.74	3.34	0.83	1.25
331	***	male	61	C:C	C:A	60.3	37.4	22.9	1.6	6.01	58	298	7.98	5.11	0.84	1.67	2.85	1.11	0.97
332	***	male	74	C:T	C:A	68.1	43.1	25	1.7	7.16	89	351	7.28	6.36	1.8	1.22	3.93	1.15	1.25
333	***	male	32	C:T	C:A	63.9	39	24.9	1.6	5.56	81	431	7.01	6.13	6.73	0.77	2.71	0.77	0.97
334	***	female	43	C:T	A:A	68.9	41.6	27.3	1.5	2.71	50	285	8.17	6.45	2.54	1.71	3.67	1.24	1.2
335	***	male	57	C:T	C:A	74.4	44.7	29.7	1.5	7.78	70	348	5.63	4.9	2.38	1.13	2.76	0.91	0.91
336	***	female	58	T:T	A:A	70.5	40.7	29.8	1.4	5.63	53	263	12.3	5.99	2.03	1.27	3.65	1.14	1.22
337	***	female	69	T:T	C:A	64.1	35.2	28.9	1.2	3.27	50	206	6.16	3.55	1.22	1.07	1.88	0.89	0.7
338	***	female	52	T:T	A:A	69.9	41.6	28.3	1.5	4.63	40	278	12.83	3.83	3.07	0.9	1.74	0.94	0.75
339	***	female	70	C:C	A:A	61.9	37.5	24.4	1.5	7.42	75	414	16.92	4.61	5.27	0.91	1.79	1.02	0.79
340	***	female	34	C:T	C:A	68	41.1	26.9	1.5	7.12	53	350	11.78	7.77	2.94	1.01	5	0.92	1.53
341	***	female	55	C:T	A:A	67.1	41.4	25.7	1.6	4.66	47	207	6.53	3.28	1.34	1.07	1.41	1.06	0.59
342	***	male	53	C:C	A:A	70	41.2	28.8	1.4	4.53	75	436	7.29	5.49	1.16	1	3.26	1.02	1.03
343	***	female	81	C:C	A:A	58	24.3	33.7	0.7				4.85	3.23	1.28	0.47	1.36	0.62	0.77
344	***	male	57	C:T	A:A	69.5	44.9	24.6	1.8	8.05	61	326	10.11	4.92	5.14	0.97	2.3	1.1	1
345	***	female	77	C:T	A:A	61.2	38.4	22.8	1.7	4.82	38	281	9.19	5.23	2.13	1.23	2.77	1.14	0.93
346	***	male	56	T:T	A:A	63.7	39.9	23.8	1.7	5.03	75	304	8.13	5.43	4.15	1.03	2.78	1.21	1.02
347	***	male	53	C:T	A:A	63.2	37.7	25.5	1.5	6.03	69	345	7.23	4.67	2.02	0.68	2.85	0.82	0.96
348	***	male	59	C:C	C:A	57.3	33.9	23.4	1.4	4.1	81	316	11.89	4.64	1.94	0.73	2.68	0.86	0.94
349	***	male	45	C:T	A:A	58.1	37.8	20.3	1.9				8.28	3.51	1.13	1.3	1.53	1.13	0.62
350	***	female	30	C:T	A:A	64	38.6	25.4	1.5	5.63	47	285	9.5	4.82	5.51	1.2	1.82	1.26	0.83
351	***	male	45	C:T	A:A	65	39.9	25.1	1.6	6.8	68	315	8.25	3.33	0.75	0.97	1.73	0.95	0.59
352	***	male	46	C:T	A:A	63.3	38.3	25	1.5	6.14	59	303	12.34	4.95	1.97	1.05	3.08	0.95	1.02
353	***	male	31	C:T	A:A	63.2	42.5	20.7	2.1	4.07	63	377	12.43	5.46	2.15	1.07	3.18	1.06	1.09
354	***	female	62	C:C	C:A	57.2	36.4	20.8	1.7	6.39	78	345	14.88	5.21	1.29	1.36	2.66	1.2	0.87
355	***	male	47	C:C	A:A	66.2	41.3	24.9	1.7	7.39	75	282	5.49	6.61	1.87	1.36	4.01	1.16	1.26
356	***	male	85	C:T	A:A	67.2	39.3	27.9	1.4	11.67	95	338	37.49	4.92	0.74	1.29	3.02	0.93	1.01
357	***	male	31	C:T	A:A	61.5	35.5	26	1.4	4.58	78	458	5.76	5.04	1.71	1.01	3.2	0.91	0.98
358	***	male	51	C:C	A:A	65.2	38.8	26.9	1.4	9.4	71	341	6.21	4.18	0.95	1.22	2.17	1.07	0.74
359	***	male	45	C:T	A:A	64.7	42.6	22.1	1.9	2.9	74	387	6.44	4.5	1.78	1.37	2.35	1.14	0.83
360	***	male	37	T:T	A:A	71.3	39.8	31.5	1.3	4.75	39	440	18.35	6.11	3.64	1.33	3.52	1.25	1.22
361	***	female	65	C:C	A:A	73.3	42.1	31.2	1.3	4.98	67	300	8.49	6.97	2.26	1.4	4.59	1.22	1.38
362	***	male	54	C:C	A:A	68.6	44	24.6	1.8	6.18	79	391	7.18	5.94	2.49	0.77	1.94	0.9	0.81
363	***	male	49	C:C	C:A	60.8	38.9	21.9	1.8	6.12	109	338	7.71	4.61	2.48	0.8	2.59	0.91	0.93
364	***	male	57	C:C	A:A	69.5	44.9	24.6	1.8	8.05	61	326	10.11	4.92	5.14	0.93	2.3	1.02	1
365	***	male	65	C:T	A:A	61.3	37.7	23.6	1.6	5.53	87	640	8.06	5.93	1.88	1.23	3.5	1.1	1.15
366	***	male	52	C:T	A:A	65.9	37.5	28.4	1.3	4.54	79	284	8.34	4.23	0.8	1.84	1.83	1.36	0.65
367	***	male	49	C:C	C:A	59.6	38.6	21	1.8	7.24	74	283	9.1	4.93	1.05	1.79	2.34	1.28	0.82
368	***	female	35	C:C	A:A	72.3	40.6	31.7	1.3	2.64	50	357	7.85	4.55	1.12	0.89	2.74	0.9	0.89
369	***	male	79	C:C	C:A	59.9	35.9	24	1.5	10.59	81	537	15.28	4.19	1.81	1.08	2.04	0.93	0.92
370	***	male	53	C:C	A:A	67.7	36.2	31.5	1.1	5.33	68	304	13.2	5.46	1.89	0.76	3.32	0.8	1.14
371	***	female	36	C:T	C:A	70.4	39.1	31.3	1.2				6.82	4.79	1.56	1.05	2.95	0.99	0.97
372	***	female	44	C:T	A:A	75.9	43.6	32.3	1.3	4.69	55	302	6.5	6.1	1.28	1.59	3.44	1.25	1.06
373	***	female	69	T:T	A:A	62.8	31.8	31	1	5.74	41	263	8.93	4.82	1.51	0.88	1.21	0.8	0.51
374	***	male	70	T:T	A:A	56.1	37.1	19	2	3.9	62	288	10.75	3.68	1.26	0.91	2.1	0.89	0.72
375	***	female	51	C:C	A:A	63.2	34.7	28.5	1.2				6.22	4.28	0.99	1.66	2.11	1.19	0.78
376	***	male	58	C:T	A:A	63.3	37.9	25.4	1.5	6.89	76	287	4.61	4.78	0.82	1.24	2.82	0.95	0.81
377	***	female	55	C:T	A:A	61.4	38	23.4	1.6	2.98	46	236	9.88	6.41	2.91	1.06	3.8	0.96	1.27
378	***	male	51	C:T	A:A	69.9	45.3	24.6	1.8	7.15	78	347	21.67	5.49	1.44	1.3	3.57	1.23	1.1
379	***	male	67	C:T	A:A	57.4	21.5	35.9	0.6	2.1	77	165	6.78	3.19	1.28	0.43	1.78	0.52	0.8
380	***	male	76	C:C	C:A	76.9	44.1	32.8	1.3	9.2	76	331	5.79	6.06	2.38	1.11	3.84	1.2	1.2
381	***	female	48	C:C	C:A	56.3	34.6	21.7	1.6	3.7	45	222	6.53	4.51	0.74	1.63	2.41	1.35	0.69
382	***	male	35	C:C	C:C	73.9	47.1	26.8	1.8	6.48	54	400	10.52	5.63	3.46	0.79	3.59	1	1.1
383	***	male	63	C:C	C:A	73.4	44.9	28.5	1.6	5.34	86	388	5.26	6.02	0.64	1.91	3.54	1.63	0.98
384	***	male	42	C:T	C:A	68.9	46.1	22.8	2	3.86	68	533	11.29	6.23	4.93	0.84	4.01	1.06	1.23
385	***	male	61	T:T	A:A	73	48.8	24.2	2	6.12	76	288	6.74	4.17	1.1	1.36	2.3	1.37	0.7
386	***	male	63	C:C	C:A	66.3	41.7	24.6	1.7	4.22	59	298	11.56	4.28	1	1.24	2.65	1.14	0.79
387	***	female	58	C:C	C:A					5.82	74	217	6.92	4.32	1.47	1.19	2.37	1.01	0.87
388	***	female	76	C:T	C:A	60.3	37.4	22.9	1.6	6.37	66	317	6.66	5.67	1.49	1.37	3.14	1.14	1.1
389	***	male	30	C:T	A:A	59	36.9	22.1	1.7				13.58	4.91	2.67	0.84	3.13	0.76	1.12
390	***	female	57	C:T	C:A	62.6	41	21.6	1.9	4.19	63	283	5.56	5.55	1.98	1.42	3.47	1.14	1.12
391	***	male	69	C:T	C:A	76.3	41.2	35.1	1.2	7.97	66	258	16.11	4.61	1.36	1.59	2.6	1.17	0.84
392	***	male	62	C:T	A:A	71.5	43.7	27.8	1.6	5.94	69	308	7.37	5.94	1.93	1.4	3.22	1.16	1.06
393	***	female	38	C:T	A:A								7.26	4.35	1.27	1.62	1.92	1.24	0.6
394	***	male	52	C:C	A:A	67.4	41.1	26.3	1.6	4.61	79	265	7.16	3.99	0.69	1.34	1.92	1.06	0.53
395	***	female	33	C:C	C:A	74.3	44.6	29.7	1.5	4.77	44	308	4.69	3.21	1.49	0.75	1.74	0.84	0.49
396	***	female	61	C:T	A:A	63.1	35.7	27.4	1.3	3.28	47	302	9.18	6.02	1.64	1.45	3.28	1.15	0.9
397	***	male	55	T:T	A:A	72	43.1	28.9	1.5	8.05	76	358	6.7	6.14	1.59	1.73	3.15	1.35	0.82
398	***	female	66	C:C	C:A	66.5	42.4	24.1	1.8	6.33	45	295	5.95	6.1	1.26	1.75	3.09	1.42	0.8
399	***	male	51	C:C	C:A	68	40.7	27.3	1.5	7.79	88	512	8.22	4.3	1.31	1.11	2.27	0.9	0.67
400	***	male	69	C:T	A:A	73.7	43.7	30	1.5	7.73	70	273	18.07	6.86	9.24	1.12	2.45	1.3	1.11
401	***	male	50	C:T	A:A	63.9	42.9	21	2	5.25	69	352	5.35	2.59	0.62	1.14	1.08	0.9	0.39
402	***	male	55	C:T	A:A	66.4	44.5	21.9	2	6.84	65	304	15.53	5.49	2.02	1.25	2.95	1.1	0.79
403	***	female	66	C:C	C:A	80.9	49.3	31.6	1.6	7.1	51	621	11.15	8.33	5.95	1.21	4.32	1.17	1.27
404	***	male	59	C:C	C:C	70.3	45.4	24.9	1.8	9.45	112	515	9.88	4.36	2.13	1.26	2.11	1.18	0.69
405	***	male	58	C:T	A:A	69.7	40.8	28.9	1.4	4.9	59	400	9.4	3.59	1.26	1.33	1.41	1.2	0.5
406	***	male	58	C:C	A:A	73.1	47.5	25.6	1.9	4.76	62	495	15.94	6.39	6.94	1.25	2.87	1.21	0.99
407	***	female	66	C:T	A:A	59.8	40.3	19.5	2.1	6.53	47	176	11.38	3.39	0.97	1.81	0.97	1.59	0.34
408	***	male	79	C:T	C:A	55.8	25.8	30	0.9	3.29	73	256	6.12	4.85	1.52	1.1	2.97	1.13	0.84
409	***	male	58	C:T	A:A	55.9	33.3	22.6	1.5	6.63	65	217	7.78	3.43	1.24	1.13	1.45	0.89	0.58
410	***	male	55	C:C	C:A	66.3	41.4	24.9	1.7	5.35	56	263	8.39	5.71	2.34	0.93	3.15	1.01	0.85
411	***	male	60	C:T	C:A	75	45.6	26.4	1.7	9.3	109	407	4.51	4.43	2.08	0.63	2.3	0.68	0.75
412	***	male	55	C:T	A:A	72.9	46.4	26.5	1.8	4.25	63	403	10.36	6.16	3.65	0.98	3.21	1.05	0.94
413	***	male	74	C:T	A:A	71.1	43.3	27.8	1.6	6.2	98	341	8.36	2.97	1.73	0.79	1.2	0.88	0.45
414	***	female	47	C:T	A:A	60.5	34.7	25.8	1.3	6.95	25	156	7.71	4.5	0.96	1.3	2.37	1.02	0.66
415	***	male	51	C:T	A:A	68.6	41.7	26.9	1.6	3.62	67	356	5.72	6.34	1.7	1.08	3.83	0.95	0.97
416	***	male	37	C:T	C:A	70.2	42.7	27.5	1.6	8.29	52	289	14.8	5.16	8.98	0.7	1.87	0.86	0.88
417	***	male	78	C:C	C:A	41.6	23.2	18.4	1.3	7.88	70	151	26.22	5.5	10.73	0.45	1.89	0.87	0.77
418	***	male	66	C:T	A:A	64	39.6	24.4	1.6	9.39	193	231	6.81	4.6	1.6	0.95	2.83	1.08	0.74
419	***	female	66	C:C	C:C	58.7	35.3	23.4	1.5	2.84	37	145	5.08	5.43	2.29	1.44	2.88	1.42	0.72
420	***	female	60	C:C	A:A	71.7	44.3	27.4	1.6	8.75	37	241	6.1	4.33	2.84	1.25	2.15	1.23	0.66
421	***	female	72	T:T	A:A	59.3	37	22.3	1.7	3.81	55	297	7.8	4.49	1.23	1.26	2.56	1.05	0.64
422	***	male	76	C:C	A:A	59.2	36.7	22.5	1.6	9.69	72	266	5.21	5.81	1.87	1.01	3.85	1.01	0.92
423	***	female	55	T:T	A:A	65.4	36.5	28.9	1.3	2.97	58	286	15.55	3.42	1.11	1.2	1.67	1.05	0.52
424	***	female	57	C:T	A:A	64.4	32.4	32.2	1	10.77	136	367	7.3	3.51	2.26	0.75	1.88	0.89	0.56
425	***	female	54	T:T	A:A	62.1	39	23.1	1.7	3.52	42	201	7.68	4.14	1.09	1.17	2.93	1.07	0.63
426	***	female	53	C:T	A:A	63.3	36.9	26.4	1.4	4.44	47	472	5.33	2.94	1.81	1.03	1.29	1	0.46
427	***	male	68	C:T	C:A	68.7	42.2	26.5	1.6	4.77	85	504	7.05	5.51	2.44	1.09	3.42	1.04	0.84
428	***	female	59	C:C	C:A	64.4	41	23.6	1.7	3.25	44	281	5.09	4.15	0.83	1.61	2.13	1.33	0.55
429	***	female	64	T:T	A:A	67.9	39.1	28.8	1.4	8.65	64	532	5.97	6.32	1.9	1.11	4.25	1.02	0.99
430	***	male	51	C:T	C:A	67.8	42.1	25.7	1.6	7.63	59	224	13.31	3.26	2.48	0.85	1.24	0.83	0.5
431	***	male	44	C:C	C:A	74.4	38.3	36.1	1.1	9.98	165	556	30.06	5.08	1.89	1.4	2.85	1.21	0.8
432	***	male	56	C:C	A:A	62.5	40.6	21.9	1.9	5.35	69	397	9.96	4.38	2.14	1.05	2.66	1.13	0.73
433	***	female	56	C:T	C:A	68.4	45.5	22.9	2	3.8	47	302	11.66	5.34	2.54	1.31	3.18	1.41	0.83
434	***	male	58	C:C	A:A	73	42.5	30.5	1.4	4.99	65	351	9.84	4.83	3.19	1.22	2.78	1.41	0.8
435	***	male	59	C:T	A:A	74	48	26	1.8	5.16	62	285	10.58	4.98	1.45	1.24	3.09	1.31	0.78
436	***	male	52	C:C	A:A	63.4	42.2	21.2	2	4.89	48	271	8.2	4.47	1.42	1.18	2.59	1.15	0.72
437	***	male	45	C:T	A:A	81.9	53.1	28.8	1.8	7.95	113	565	6.89	4.32	2.81	1.27	1.93	1.27	0.7
438	***	male	60	C:T	A:A	71.7	43.5	28.2	1.5	5.41	65	455	13.22	3.91	4.58	0.61	1.67	0.91	0.67
439	***	male	44	C:T	A:A	65.8	43.3	22.4	1.9	5.22	53	287	11.1	4.59	1.38	1.69	2.33	1.53	0.61
440	***	female	33	C:C	A:A	67.7	41.9	25.8	1.6	3.89	39	381	14.18	4	1.71	0.82	2.53	0.96	0.69
441	***	female	67	C:C	A:A	71.3	43.8	27.5	1.6	3.73	40	337	8.81	5.57	1.67	1.56	3.35	1.45	0.85
442	***	female	56	C:T	C:A	69.1	40	29.1	1.4	5.06	49	312	11.6	6.18	2.26	1.02	4.06	0.97	1.04
443	***	female	46	C:C	C:A	59.8	40	19.8	2	4.36	46	342	7.67	5.93	2.65	1	3.98	1.02	0.96
444	***	male	61	C:T	A:A	59.2	36.7	22.5	1.6	4.16	100	334	6.47	4.46	3.63	1.09	2.15	1.25	0.7
445	***	male	42	C:T	C:A	63.2	41.4	21.8	1.9	4.38	72	470	7.03	3.43	1.32	0.83	2.09	0.83	0.57
